# Supplementary material
Source: ML conference proceedings conference paper supplement (https://openreview.net/forum?id=Vota6rFhBQ)
Supplement: supplementary_material [file attachment]

---

# Fine-Tuning Language Models with Just Forward Passes

---

Anonymous Author(s)

Affiliation

Address

email

## Abstract

1 Fine-tuning language models (LMs) has yielded success on diverse downstream  
2 tasks, but as LMs grow in size, backpropagation requires a prohibitively large  
3 amount of memory. Zeroth-order (ZO) methods can in principle estimate gradients  
4 using only two forward passes but are theorized to be catastrophically slow for  
5 optimizing large models. In this work, we propose a memory-efficient zeroth-  
6 order optimizer (**MeZO**), adapting the classical ZO-SGD method to operate in-  
7 place, thereby fine-tuning LMs with *the same memory footprint as inference*. For  
8 example, with a single A100 80GB GPU, MeZO can train a 30-billion parameter  
9 model, whereas fine-tuning with backpropagation can train only a 2.7B LM with  
10 the same budget. We conduct comprehensive experiments across model types  
11 (masked and autoregressive LMs), model scales (up to 66B), and downstream tasks  
12 (classification, multiple-choice, and generation). Our results demonstrate that (1)  
13 MeZO significantly outperforms in-context learning and linear probing; (2) MeZO  
14 achieves comparable performance to fine-tuning with backpropagation across  
15 multiple tasks, with up to  $12\times$  memory reduction; (3) MeZO is compatible with  
16 both full-parameter and parameter-efficient tuning techniques such as LoRA and  
17 prefix tuning; (4) MeZO can effectively optimize non-differentiable objectives (e.g.,  
18 maximizing accuracy or F1). We support our empirical findings with theoretical  
19 insights, highlighting how adequate pre-training and task prompts enable MeZO to  
20 fine-tune huge models, despite classical ZO analyses suggesting otherwise.

## 21 1 Introduction

22 Fine-tuning pre-trained language models (LMs) has been the dominant methodology for solving many  
23 language tasks [27], adapting to specialized domains [40], or incorporating human instructions and  
24 preferences [70]. However, as LMs are scaled up [12, 69], computing gradients for backpropagation  
25 requires a prohibitive amounts of memory – in our test, up to  $12\times$  the memory required for inference  
26 – because it needs to cache activations during the forward pass, gradients during the backward pass,  
27 and, in the case of Adam [50], also store gradient history (see Section 3.4 for a detailed analysis).

28 As a result, while it is possible to run inference with a 30-billion (30B) parameter LM on a single  
29 Nvidia A100 GPU (with 80GB memory), backpropagation with Adam is feasible only for a 2.7B LM.  
30 Parameter-efficient fine-tuning methods (PEFT [44, 55, 52]) update just a fraction of the network  
31 parameters, but still need to cache many activations, because the tuned parameters are scattered  
32 throughout the model. In our tests, fine-tuning an OPT-13B model with full parameter or PEFT  
33 requires  $12\times$  and  $6\times$  more memory than inference respectively.

34 *In-context learning* (ICL [12]) has allowed solving many tasks with a single inference pass, during  
35 which the model processes labeled examples (*demonstrations*) in its context and then outputs a  
36 prediction on a test example. While this allows for quick adaptation of the model to specific use cases,

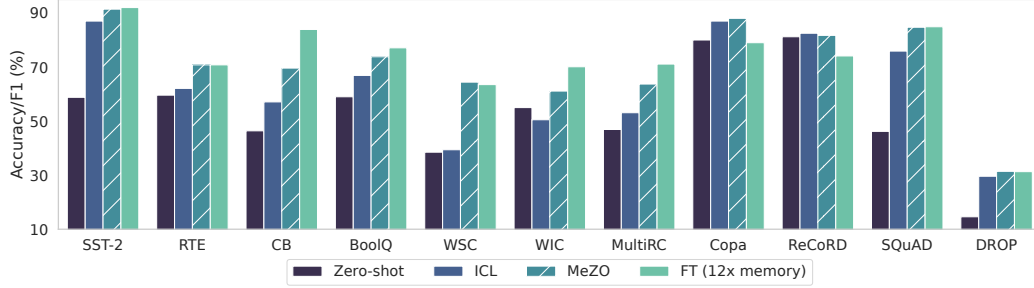

Figure 1: OPT-13B results with zero-shot, in-context learning (ICL), MeZO (we report the best among MeZO/MeZO (LoRA)/MeZO (prefix)), and fine-tuning with Adam (FT). MeZO demonstrates superior results over zero-shot and ICL and performs on par with FT (within 1%) on 7 out of 11 tasks, despite using only 1/12 memory. See Table 1 for detailed numbers and Figure 3 for memory profiling.

current models allow a limited context size (and thus, limited demonstrations) and the performance is sensitive to the formatting and choice of demonstrations [58, 64]. ICL also often performs worse than fine-tuning of medium-sized models [12]. Besides, inference with ICL is more expensive, as it always requires demonstrations in context and thus increases the input length.

Another reason to consider alternatives to standard backpropagation is that it cannot incorporate non-differentiable criteria, which have gained popularity in fine-tuning LMs according to human preference scores or set safety standards [84, 70]. Typically, these adaptations involve reinforcement learning from human feedback (RLHF [19]), which is expensive.

A classical zeroth-order optimization method (ZO-SGD [83]) uses only differences of loss values to estimate the gradients. Thus in principle, the method can update neural networks with just forward passes, though naive implementation still doubles the memory overhead and classical lower bounds [67, 31] suggest that convergence slows linearly with model size. As such, ZO methods have been applied in deep learning settings to find adversarial examples or tune input embeddings [86, 85] but not to directly optimize large-scale models (see Liu et al. [59] for a survey).

In this work, we propose a memory-efficient zeroth-order optimizer (MeZO), which adapts the classical ZO-SGD algorithm and reduces its memory consumption *to the same as inference*. We apply MeZO to fine-tune large LMs and show that, both empirically and theoretically, MeZO can successfully optimize LMs with billions of parameters. Specifically, our contributions are:

1. In MeZO, we adapt the ZO-SGD algorithm [83] and a number of variants to operate in-place on arbitrarily large models with almost no memory overhead (see Algorithm 1 and Section 2).
2. We conduct comprehensive experiments across model types (masked LM and autoregressive LM), model scales (from 350M to 66B), and downstream tasks (classification, multiple-choice, and generation). MeZO consistently demonstrates superiority over zero-shot, ICL, and linear probing. Moreover, with RoBERTa-large, MeZO achieves performance close to standard fine-tuning within 5% gap; with OPT-13B, MeZO outperforms or performs comparably to fine-tuning on 7 out of 11 tasks, despite requiring roughly  $12\times$  less memory (Figure 1 and Section 3).
3. We demonstrate MeZO’s compatibility with full-parameter tuning and PEFT (e.g., LoRA [44] and prefix-tuning [55]) in Section 3.
4. Further exploration showcases that MeZO can optimize non-differentiable objectives such as accuracy or F1 score, while still requiring only the same memory as inference (Section 3.3).
5. Our theory suggests that adequate pre-training ensures the per-step optimization rate (Theorem 1) and global convergence rate (Lemma 3) of MeZO depend on a certain condition number of the landscape (i.e., the local effective rank, see Assumption 1) instead of numbers of parameters. This result is in sharp contrast to existing ZO lower bounds [67, 31] suggesting that the convergence rate can slow proportionally to the number of parameters (Section 4).

## 2 Zeroth-order optimization

Zeroth-order (ZO) optimizers have long been studied in the context of convex and strongly convex objectives. In the following, we first introduce a classical ZO gradient estimator, SPSA (Defini-

---

**Algorithm 1: MeZO**

---

**Require:** parameters  $\theta \in \mathbb{R}^d$ , loss  $\mathcal{L} : \mathbb{R}^d \rightarrow \mathbb{R}$ , step budget  $T$ , perturbation scale  $\epsilon$ , batch size  $B$   
learning rate schedule  $\{\eta_t\}$

```
for  $t = 1, \dots, T$  do
  Sample batch  $\mathcal{B} \subset \mathcal{D}$  and random seed  $s$ 
   $\theta \leftarrow \text{PerturbParameters}(\theta, \epsilon, s)$ 
   $\ell_+ \leftarrow \mathcal{L}(\theta; \mathcal{B})$ 
   $\theta \leftarrow \text{PerturbParameters}(\theta, -2\epsilon, s)$ 
   $\ell_- \leftarrow \mathcal{L}(\theta; \mathcal{B})$ 
   $\theta \leftarrow \text{PerturbParameters}(\theta, \epsilon, s)$   $\triangleright$  Reset parameters before descent
  projected_grad  $\leftarrow (\ell_+ - \ell_-)/(2\epsilon)$ 
  Reset random number generator with seed  $s$   $\triangleright$  For sampling  $z$ 
  for  $\theta_i \in \theta$  do
     $z \sim \mathcal{N}(0, 1)$ 
     $\theta_i \leftarrow \theta_i - \eta_t * \text{projected\_grad} * z$ 
  end
end

Subroutine  $\text{PerturbParameters}(\theta, \epsilon, s)$ 
  Reset random number generator with seed  $s$   $\triangleright$  For sampling  $z$ 
  for  $\theta_i \in \theta$  do
     $z \sim \mathcal{N}(0, 1)$ 
     $\theta_i \leftarrow \theta_i + \epsilon z$   $\triangleright$  Modify parameters in place
  end
  return  $\theta$ 
```

---

tion 1 [83]) and the corresponding SGD algorithm, ZO-SGD (Definition 2). Then we describe MeZO, our in-place implementation that requires the same memory as inference in Section 2.1 and Algorithm 1. We highlight that SPSA can also be used in more complex optimizers, such as Adam, and we provide memory-efficient implementations for those algorithms too (Section 2.2).

Consider a labelled dataset  $\mathcal{D} = \{(x_i, y_i)\}_{i \in [|\mathcal{D}|]}$  and a minibatch  $\mathcal{B} \subset \mathcal{D}$  of size  $B$ , we let  $\mathcal{L}(\theta; \mathcal{B})$  denote the loss on the minibatch. We introduce a classical ZO gradient estimate in this setting.

**Definition 1** (Simultaneous Perturbation Stochastic Approximation or SPSA [83]). *Given a model with parameters  $\theta \in \mathbb{R}^d$  and a loss function  $\mathcal{L}$ , SPSA estimates the gradient on a minibatch  $\mathcal{B}$  as*

$$\widehat{\nabla} \mathcal{L}(\theta; \mathcal{B}) = \frac{\mathcal{L}(\theta + \epsilon z; \mathcal{B}) - \mathcal{L}(\theta - \epsilon z; \mathcal{B})}{2\epsilon} z \approx z z^\top \nabla \mathcal{L}(\theta; \mathcal{B}) \quad (1)$$

where  $z \in \mathbb{R}^d$  with  $z \sim \mathcal{N}(0, I_d)$  and  $\epsilon$  is the perturbation scale. The  $n$ -SPSA gradient estimate averages  $\widehat{\nabla} \mathcal{L}(\theta; \mathcal{B})$  over  $n$  randomly sampled  $z$ .

SPSA requires only two forward passes through the model to compute the gradient estimate (for  $n$ -SPSA, each estimate requires  $2n$  forward passes). During training,  $n$  can be treated as a hyperparameter and follow a schedule [10, 14], though in cursory experiments (Appendix A),  $n = 1$  is the most efficient. We use  $n = 1$  as the default. It is widely known that the estimate can be used to replace the backpropagation gradient in any optimizer such as SGD.

**Definition 2** (ZO-SGD). *ZO-SGD is an optimizer with learning rate  $\eta$  that updates parameters as  $\theta_{t+1} = \theta_t - \eta \widehat{\nabla} \mathcal{L}(\theta; \mathcal{B}_t)$  where  $\mathcal{B}_t$  is the minibatch at time  $t$  and  $\widehat{\nabla} \mathcal{L}$  is the SPSA gradient estimate.*

## 2.1 Memory-efficient ZO-SGD (MeZO)

The vanilla ZO-SGD algorithm costs twice the memory of inference, as it needs to store  $z \in \mathbb{R}^d$ . We propose a memory-efficient implementation of ZO-SGD called **MeZO**, as illustrated in Algorithm 1. At each step, we first sample a random seed  $s$ , and then for each of  $z$ 's four uses in Algorithm 1, we reset the random number generator by  $s$  and *resample* the relevant entry of  $z$ . Using this in-place implementation, MeZO has a memory footprint equivalent to the inference memory cost.

We note that Algorithm 1 describes perturbing each parameter separately, which may be time-consuming for large models. In practice, we can save time by perturbing an entire weight matrix

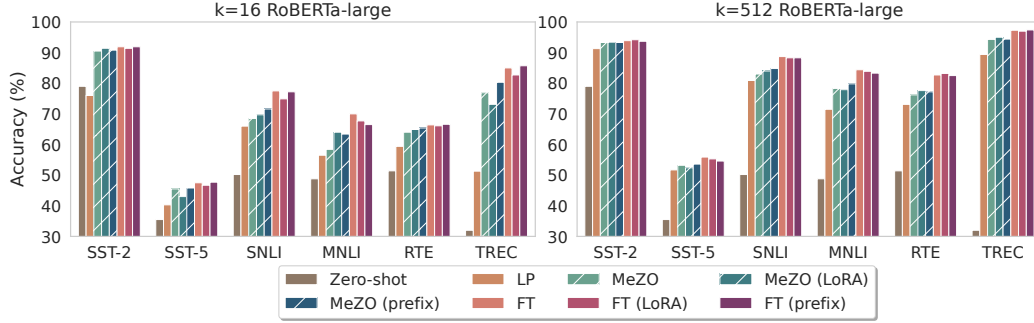

Figure 2: Experiments on RoBERTa-large. We report zero-shot, linear probing (LP), and MeZO and fine-tuning (FT) with full parameter, LoRA, and prefix-tuning. MeZO outperforms zero-shot and LP and approaches FT (within 5% for  $k = 512$ ) with much less memory. Detailed numbers in Table 16.

instead of each scalar independently. This incurs an additional memory cost as large as the largest weight matrix; usually, this is the word embedding matrix (e.g., 0.86GB for OPT-66B).

## 2.2 MeZO extensions

MeZO can also be combined with other gradient-based optimizers, including SGD with momentum or Adam. Though naive implementation would require additional memory to store the gradient moment estimates, MeZO-momentum and MeZO-Adam alleviate such overhead by recomputing the moving average of the gradients using saved pass losses and  $z$  (see Appendix B for a full discussion).

We also note that all of the coordinates of the SPSA gradient estimate have the same scale, but deep Transformers can have gradients of different scales for each layer [57, 59]. As such, we draw inspiration from layerwise adaptive optimizers [102, 103] to design several MeZO variants. cursory experiments showed that these algorithms are not more efficient (in terms of forward passes), but we nevertheless present them as potential optimizers for more complex objectives. See Appendix B.

## 3 Experiments

Preliminary experiments (Appendix A) show that ZO only works when using prompts [12, 80, 33]. All experiments below use prompts detailed in Appendix D.2. All fine-tuning with backpropagation (FT) experiments follow convention and use Adam though we also show FT with SGD in Appendix E.

We conduct comprehensive experiments on both medium-sized masked LMs (RoBERTa-large, 350M [63]) and large autoregressive LMs (OPT-13B, 30B, 66B [105]) in few-shot and many-shot settings with prompts. We also explore both full-parameter tuning and PEFT including LoRA [44] and prefix-tuning [55] (see Appendix D.5 for details). We compare MeZO with zero-shot, in-context learning (ICL), linear-probing (LP), and fine-tuning with Adam (FT). MeZO uses substantially less memory than FT but requires significantly more training steps.

We first show that MeZO improves substantially over zero-shot, ICL, and LP across model types, sizes, and task types. Moreover, MeZO performs comparably to FT over a number of tasks, while drastically reducing the memory cost by, for example,  $12\times$  on OPT-13B. Further experiments demonstrate that MeZO can optimize non-differentiable objectives, such as accuracy and F1 score (Section 3.3). We compare the memory consumption of ICL, FT, LP, and MeZO in Figures 3 and 4.

### 3.1 Medium-sized masked language models

We conduct experiments with RoBERTa-large on sentiment classification, natural language inference, and topic classification tasks. We follow [33, 65] to study the few-shot and many-shot settings, sampling  $k$  examples per class for  $k = 16$  and  $k = 512$  (details in Appendix D). We summarize the results from Figure 2 and Table 16 below.

**MeZO works significantly better than zero-shot, linear probing, and other memory-equivalent methods.** On all six diverse tasks, MeZO can optimize the pre-trained model and consistently

| Task<br>Task type | SST-2              | RTE         | CB          | BoolQ       | WSC         | WIC         | MultiRC     | COPA                | ReCoRD      | SQuAD          | DROP        |
|-------------------|--------------------|-------------|-------------|-------------|-------------|-------------|-------------|---------------------|-------------|----------------|-------------|
|                   | — classification — |             |             |             |             |             |             | — multiple choice — |             | — generation — |             |
| Zero-shot         | 58.8               | 59.6        | 46.4        | 59.0        | 38.5        | 55.0        | 46.9        | 80.0                | 81.2        | 46.2           | 14.6        |
| ICL               | 87.0               | 62.1        | 57.1        | 66.9        | 39.4        | 50.5        | 53.1        | 87.0                | <b>82.5</b> | 75.9           | 29.6        |
| LP                | <b>93.4</b>        | 68.6        | 67.9        | 59.3        | 63.5        | 60.2        | 63.5        | 55.0                | 27.1        | 3.7            | 11.1        |
| MeZO              | 91.4               | 66.1        | 67.9        | 67.6        | 63.5        | <b>61.1</b> | 60.1        | <b>88.0</b>         | 81.7        | <b>84.7</b>    | 30.9        |
| MeZO (LoRA)       | 89.6               | 67.9        | 66.1        | <b>73.8</b> | <b>64.4</b> | 59.7        | 61.5        | 87.0                | 81.4        | 83.8           | <b>31.4</b> |
| MeZO (prefix)     | 90.7               | <b>70.8</b> | <b>69.6</b> | 73.1        | 57.7        | 59.9        | <b>63.7</b> | 84.0                | 81.2        | 84.2           | 28.9        |
| FT (12x memory)   | 92.0               | 70.8        | 83.9        | 77.1        | 63.5        | 70.1        | 71.1        | 79.0                | 74.1        | 84.9           | 31.3        |

Table 1: Experiments on OPT-13B (with 1,000 examples). ICL: in-context learning; LP: linear probing; FT: full fine-tuning with Adam. MeZO outperforms zero-shot, ICL, and LP across the board, and achieves comparable (within 1%) or better performance than FT on 7 out of 11 tasks.

| Task                   | SST-2       | RTE         | BoolQ       | WSC         | WIC         | SQuAD       |
|------------------------|-------------|-------------|-------------|-------------|-------------|-------------|
| 30B zero-shot          | 56.7        | 52.0        | 39.1        | 38.5        | 50.2        | 46.5        |
| 30B ICL                | 81.9        | 66.8        | 66.2        | 56.7        | 51.3        | 78.0        |
| 30B MeZO/MeZO (prefix) | <b>90.6</b> | <b>72.6</b> | <b>73.5</b> | <b>63.5</b> | <b>59.1</b> | <b>85.2</b> |
| 66B zero-shot          | 57.5        | <b>67.2</b> | 66.8        | 43.3        | 50.6        | 48.1        |
| 66B ICL                | 89.3        | 65.3        | 62.8        | 52.9        | 54.9        | 81.3        |
| 66B MeZO/MeZO (prefix) | <b>93.6</b> | 66.4        | <b>73.7</b> | <b>63.5</b> | <b>58.9</b> | <b>85.0</b> |

Table 2: Experiments on OPT-30B and OPT-66B (with 1,000 examples). We report the best of MeZO and MeZO (prefix). See Appendix E.2 for more results. We see that on most tasks MeZO effectively optimizes up to 66B models and outperforms zero-shot and ICL.

perform better than zero-shot and linear probing. We also show for several tasks that MeZO can outperform another ZO algorithm, BBTv2 [85], by up to 11% absolute (Appendix E.4).<sup>1</sup>

**With enough data, MeZO achieves comparable performance (up to 5% gap) to FT.** MeZO achieves close-to-fine-tuning performance on  $k = 16$ , with some tasks only having 2% gaps. When using  $k = 512$  data, the gap between MeZO and FT further reduced to within 5% across all tasks.

**MeZO works well on both full-parameter tuning and PEFT.** Full-parameter tuning (MeZO) and PEFT (MeZO with LoRA and prefix-tuning) achieve comparable performance, while MeZO (prefix) sometimes outperforms MeZO. We also show in Appendix E.3 that the three variants converge at similar rates, agreeing with our theory in Section 4, which shows that MeZO converges at a rate independent of the number of parameters being optimized.

We show additional results with more FT (FT with SGD) and MeZO variants in Appendix E.1. We see that (1) ZO-Adam sometimes outperforms ZO-SGD but is not consistent across tasks; (2) LP and then MeZO, as suggested for fine-tuning [51], can sometimes improve the performance.

### 3.2 Large autoregressive language models

With the promising results from RoBERTa-large, we extend MeZO to the OPT family [105], on a scale of 13B (Table 1), 30B, and 66B (Table 2). We select both SuperGLUE [92] tasks<sup>2</sup> (including classification and multiple-choice) and generation tasks. We randomly sample 1000, 500, and 1000 examples for training, validation, and test respectively for each dataset. Please refer to Appendix D for details. From the main results in Table 1, we reach the following observations.

**MeZO outperforms memory-equivalent methods and closely approaches fine-tuning results.** We see that on a 13B-parameter scale, MeZO and its PEFT variants outperform zero-shot, ICL, and LP across almost all tasks. When comparing to FT, which costs  $12\times$  more memory (Section 3.4), MeZO achieves comparable (within 1%) or better performance on 7 out of the 11 tasks.

<sup>1</sup>BBTv2 is sensitive to #parameters and can only train down-projected prefixes instead of the full model.

<sup>2</sup>We also include SST-2, which is a simple sentiment classification task that we use for development.

| Model<br>Task        | RoBERTa-large (350M) |       |      |      | OPT-13B |
|----------------------|----------------------|-------|------|------|---------|
|                      | SST-2                | SST-5 | SNLI | TREC | SQuAD   |
| Zero-shot            | 79.0                 | 35.5  | 50.2 | 32.0 | 46.2    |
| Cross entropy (FT)   | 93.9                 | 55.9  | 88.7 | 97.3 | 84.2    |
| Cross entropy (MeZO) | 93.3                 | 53.2  | 83.0 | 94.3 | 84.7    |
| Accuracy/F1 (MeZO)   | 92.7                 | 48.9  | 82.7 | 68.6 | 78.5    |

Table 3: MeZO with non-differentiable objectives. For classification ( $k = 512$ ), we use MeZO with full-parameter and optimize accuracy; for SQuAD (1,000 examples), we use MeZO (prefix) and F1.

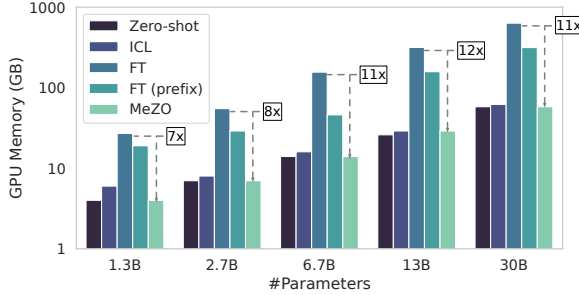

Figure 3: GPU memory consumption with different OPT models and tuning methods on MultiRC (400 tokens per example on average).

| Hardware       | Largest OPT that can fit |           |                   |
|----------------|--------------------------|-----------|-------------------|
|                | FT                       | FT-prefix | MeZO              |
| 1×A100 (80GB)  | 2.7B                     | 6.7B      | 30B               |
| 2×A100 (160GB) | 6.7B                     | 13B       | 66B               |
| 4×A100 (320GB) | 13B                      | 30B       | 66B               |
| 8×A100 (640GB) | 30B                      | 66B       | 175B <sup>†</sup> |

Figure 4: Largest OPT models that one can tune with specific hardware and algorithms. <sup>†</sup> : projected results without actual testing.

**MeZO exhibits strong performance across classification, multiple-choice, and generation tasks.** We investigate MeZO on generation tasks, which are regarded as more intricate than classification or multiple-choice tasks. We evaluate on two question answering datasets, SQuAD [77] and DROP [30]. We use teacher-forcing for training and greedy decoding for inference (details in Appendix D).

Table 1 shows that, on all generation tasks, MeZO outperforms zero-shot, ICL, and LP, and achieves comparable performance to FT. Considering that many applications of fine-tuning LMs – including instruction tuning or domain adaptation – target generation tasks, our results underscore the potential of MeZO as a memory-efficient technique to optimize large LMs for realistic and exciting applications.

**MeZO scales up to 66 billion parameter models.** We demonstrate the efficacy of MeZO on even larger models, up to 66B, in Table 2. While directly fine-tuning models at such scales are extremely costly (Section 3.4), MeZO can effectively optimize these models and outperform zero-shot and ICL.

### 3.3 Training with non-differentiable objectives

We demonstrate the efficacy of MeZO for optimizing non-differentiable objectives through initial experiments. Accuracy and F1 are used as the respective objectives (details in Appendix D.6). Table 3 reveals that MeZO with accuracy/F1 successfully optimizes LMs with superior performance to zero-shot. Although minimizing cross entropy results in stronger performance, these preliminary findings highlight the promising potential of applying MeZO to optimize non-differentiable objectives without clear differentiable surrogates, such as human preferences [70].

### 3.4 Memory usage

In this section we profile the memory usage of zero-shot, ICL, FT, FT (prefix), and MeZO. We test OPT models of various sizes with Nvidia A100 GPUs (80GB memory) on MultiRC (average #tokens=400), and report the peak GPU memory consumption (details in Appendix D.7).

As shown in Figure 3 (refer to Appendix E.5 for detailed numbers), MeZO exhibits the same memory consumption as zero-shot while offering memory savings of up to 12 times compared to standard FT and 6 times compared to FT (prefix). This advantage enables training larger models within a fixed hardware budget, as illustrated in Figure 4. Specifically, using a single A100 GPU, MeZO allows for tuning a model that is 11 times larger than what is feasible with FT.



184 The above measurements are dependent on the infrastructure and packages being used. In Appendix C,  
 185 we compare the theoretical time-memory tradeoff of MeZO and backpropagation. We find that MeZO  
 186 is always more memory-efficient than backpropagation and is often more time-efficient. Both modes  
 187 of memory analysis above also do not consider recent advances in making transformers more memory  
 188 efficient, e.g., gradient checkpointing [17], FlashAttention [22], and quantization training [26]. We  
 189 leave investigating the how MeZO works with these methods to future work.

## 190 4 Theory

191 Our theoretical analysis highlights why MeZO can optimize large LMs, although a number of classical  
 192 results [67, 45, 76, 3] suggest that optimization should be catastrophically slow when training so  
 193 many parameters. In this section, we show that when the loss landscape exhibits favorable conditions  
 194 (Assumption 1), we can derive a convergence rate independent of the number of parameters. We show  
 195 that the loss decreases per step at a rate independent of the parameter dimension  $d$  (Theorem 1), and  
 196 that, under stronger conditions, the algorithm converges in time independent of  $d$  (Lemma 3). Together,  
 197 these results imply that MeZO is not catastrophically slower than SGD when fine-tuning.<sup>3</sup> For ease  
 198 of illustration, we assume that  $\mathbf{z}$  is sampled from a sphere with radius  $\sqrt{d}$ , and in Appendix F.2 we  
 199 derive the rate for a general Gaussian  $\mathbf{z}$ , which was used in the experiments.

200 We follow classical analyses of SGD and replace the mini-batch gradient estimate with SPSA.  
 201 Consider the minibatch SGD update  $\boldsymbol{\theta}_{t+1} \leftarrow \boldsymbol{\theta}_t - \eta \nabla \mathcal{L}(\boldsymbol{\theta}; \mathcal{B}_t)$  where  $\mathcal{B}_t$  is a minibatch drawn  
 202 uniformly from  $\mathcal{D}^B$ . Crucially, the SGD minibatch gradient estimate is unbiased.

203 **Definition 3** (Unbiased Gradient Estimate). *Any minibatch gradient estimate  $\mathbf{g}(\boldsymbol{\theta}, \mathcal{B})$  is said to be*  
 204 *unbiased if  $\mathbb{E}[\mathbf{g}(\boldsymbol{\theta}, \mathcal{B})] = \nabla \mathcal{L}(\boldsymbol{\theta})$ .*

### 205 4.1 Per-step analysis

206 The classical descent lemma uses a Taylor expansion to study how SGD reduces the loss at each  
 207 optimization step. It highlights that when the gradient covariance is large, the maximum possible  
 208 decrease in loss at each optimization step is small, thereby resulting in slower optimization.

209 **Lemma 1** (Descent Lemma). *Let  $\mathcal{L}(\boldsymbol{\theta})$  be  $\ell$ -smooth.<sup>4</sup> For any unbiased gradient estimate  $\mathbf{g}(\boldsymbol{\theta}, \mathcal{B})$ ,*

$$\mathbb{E}[\mathcal{L}(\boldsymbol{\theta}_{t+1}) \mid \boldsymbol{\theta}_t] - \mathcal{L}(\boldsymbol{\theta}_t) \leq -\eta \|\nabla \mathcal{L}(\boldsymbol{\theta}_t)\|^2 + \frac{1}{2} \eta^2 \ell \cdot \mathbb{E}[\|\mathbf{g}(\boldsymbol{\theta}, \mathcal{B}_t)\|^2]. \quad (2)$$

210 The descent lemma highlights the importance of the gradient norm, which we derive for MeZO below.

211 **Lemma 2.** *Let  $\mathcal{B}$  be a random minibatch of size  $B$ . Then, the gradient norm of MeZO is*

$$\mathbb{E}_x \left[ \left\| \widehat{\nabla} \mathcal{L}(\boldsymbol{\theta}; \mathcal{B}) \right\|^2 \right] = \frac{d + n - 1}{n} \mathbb{E} \left[ \left\| \nabla \mathcal{L}(\boldsymbol{\theta}; \mathcal{B}) \right\|^2 \right].$$

212 *where  $n$  is the number of  $\mathbf{z}$  sampled in  $n$ -SPSA (Definition 1) and  $d$  is the number of parameters.*

213 Thus, in the usual case where  $n \ll d$ , MeZO has a much larger gradient norm than SGD.<sup>5</sup> The  
 214 descent lemma also shows that to guarantee loss decrease, one needs to choose the learning rate as

$$\eta \leq \frac{2 \|\nabla \mathcal{L}(\boldsymbol{\theta}_t)\|^2}{\ell \cdot \mathbb{E}[\|\mathbf{g}(\boldsymbol{\theta}, \mathcal{B})\|^2]} \xrightarrow{\text{Lemma 2}} \eta_{\text{ZO}} = \frac{n}{d + n - 1} \eta_{\text{SGD}} \quad (3)$$

215 where  $\eta_{\text{ZO}}$  and  $\eta_{\text{SGD}}$  are the maximum permissible learning rates for MeZO and SGD respectively.  
 216 Thus we see that without any further assumptions, MeZO can slow optimization by decreasing the  
 217 largest permissible learning rate by a factor of  $d$ . Moreover, MeZO reduces the loss decrease that can  
 218 be obtained at each step and, as a consequence, slows convergence by a factor of  $d$  as well.

219 Surprisingly, our experiments show that MeZO can quickly optimize pre-trained models with billions  
 220 of parameters, and reducing the number of tuned parameters via PEFT techniques does not substan-  
 221 tially accelerate optimization (Appendix E.3). We attribute these phenomena to the Hessian of the

<sup>3</sup>Section 3 uses the standard choice of Adam for FT; we provide SGD experiments in Appendix E.1.

<sup>4</sup>This is satisfied for the standard cross-entropy objective.

<sup>5</sup>All of our experiments use  $n = 1$ .

loss exhibiting small local effective rank. It is prohibitively expensive to directly measure the effective rank of the Hessian of a large LM on a reasonably sized dataset. However, many previous works have shown that the Hessian of the loss for deep neural networks trained by SGD has remarkably low effective rank [71, 72, 34, 100, 99, 79]. In particular, the bulk of the spectrum concentrates around 0 with only a small number of outliers, and the number of these outliers is an upper bound on the effective rank. In addition, prior works [4, 54] have demonstrated that LM fine-tuning can occur in a very low dimensional subspace ( $< 200$  parameters), which further supports the below assumption. We formalize the assumption on the effective rank below. In particular, we require an upper bound on the Hessian in a neighborhood around the current iterate to have effective rank at most  $r$ .

**Assumption 1** (Local  $r$ -effective rank). *Let  $G(\theta_t) = \max_{(x, y) \in \mathcal{D}} \|\nabla \mathcal{L}(\theta_t; \{(x, y)\})\|$ . There exists a matrix  $\mathbf{H}(\theta_t)$  such that:*

1. *For all  $\theta$  such that  $\|\theta - \theta_t\| \leq \eta d G(\theta_t)$ , we have  $\nabla^2 \mathcal{L}(\theta) \preceq \mathbf{H}(\theta_t)$ .*
2. *The effective rank of  $\mathbf{H}(\theta_t)$ , i.e  $\text{tr}(\mathbf{H}(\theta_t)) / \|\mathbf{H}(\theta_t)\|_{op}$ , is at most  $r$ .*

Under this assumption, we show that the convergence rate of ZO-SGD does not depend on the number of parameters. Instead, the slowdown factor only depends on the effective rank of the Hessian.

**Theorem 1** (Dimension-Free Rate). *Assume the loss exhibits local  $r$ -effective rank (Assumption 1). If  $\theta_{t+1} = \theta_t - \eta_{ZO} \widehat{\nabla} \mathcal{L}(\theta_t; \mathcal{B})$  is a single step of ZO-SGD using the  $n$ -SPSA estimate with a minibatch of size  $B$ , then there exists a  $\gamma = \Theta(r/n)$  such that the expected loss decrease can be bounded as*

$$\mathbb{E}[\mathcal{L}(\theta_{t+1}) \mid \theta_t] - \mathcal{L}(\theta_t) \leq -\eta_{ZO} \|\nabla \mathcal{L}(\theta_t)\|^2 + \frac{1}{2} \eta_{ZO}^2 \ell \cdot \gamma \cdot \mathbb{E}[\|\nabla \mathcal{L}(\theta; \mathcal{B})\|^2] \quad (4)$$

By applying Equation (3), we can directly compare to the SGD descent lemma.

**Corollary 1.** *Choosing the learning rate  $\eta_{ZO} = \gamma^{-1} \cdot \eta_{SGD}$ , ZO-SGD obtains a loss decrease of*

$$\mathbb{E}[\mathcal{L}(\theta_{t+1}) \mid \theta_t] - \mathcal{L}(\theta_t) \leq \frac{1}{\gamma} \cdot \left[ -\eta_{SGD} \|\nabla \mathcal{L}(\theta_t)\|^2 + \frac{1}{2} \eta_{SGD}^2 \ell \cdot \mathbb{E}[\|\nabla \mathcal{L}(\theta; \mathcal{B})\|^2] \right]. \quad (5)$$

Here we see that comparing to SGD, the slowdown factor of ZO-SGD scales with the local effective rank  $r$ , which we argue is much smaller than the number of parameters  $d$ . The above analysis focuses on how much ZO-SGD and SGD decrease the loss at each step. Below, we show that under stronger assumptions about the loss landscape, we can obtain rates for how quickly the ZO-SGD algorithm converges to an optimal value.

## 4.2 Global convergence analysis

We show that the global convergence rate also slows by a factor proportional to the local effective rank under stronger assumptions about the loss landscape. We assume that the landscape obeys the classical PL inequality: the gradient norm grows quadratically with the suboptimality of the iterate.

**Definition 4** (PL Inequality). *Let  $\mathcal{L}^* = \min_{\theta} \mathcal{L}(\theta)$ . The loss  $\mathcal{L}$  is  $\mu$ -PL if, for all  $\theta$ ,  $\frac{1}{2} \|\nabla \mathcal{L}(\theta)\|^2 \geq \mu(\mathcal{L}(\theta) - \mathcal{L}^*)$ .*

The PL inequality is not as strong as assuming that optimization exhibits kernel-like dynamics, but it ensures that the landscape is amenable to analysis [48]. In addition to the PL inequality, we assume the trace of the gradient covariance is bounded, so noise does not disrupt the trajectory too drastically.

**Definition 5** (Gradient Covariance). *The SGD gradient estimate on a minibatch of size  $B$  has covariance  $\Sigma(\theta) = B(\mathbb{E}[\nabla \mathcal{L}(\theta; \mathcal{B}) \nabla \mathcal{L}(\theta; \mathcal{B})^\top] - \nabla \mathcal{L}(\theta) \nabla \mathcal{L}(\theta)^\top)$ .*

As we show in Appendix F.1, this assumption holds for common loss functions such as square loss or binary cross entropy for several settings (e.g., kernel behavior [65]). With these two assumptions, we show that ZO-SGD has a slowdown proportional to the effective rank  $r$ , not the parameter dimension.



**Lemma 3** (Global Convergence of ZO-SGD). *Let  $\mathcal{L}(\theta)$  be  $\mu$ -PL and let there exist  $\alpha$  such that  $\text{tr}(\Sigma(\theta)) \leq \alpha(\mathcal{L}(\theta) - \mathcal{L}^*)$  for all  $\theta$ . Then after*

$$t = \mathcal{O} \left( \left( \frac{r}{n} + 1 \right) \cdot \underbrace{\left( \frac{\ell}{\mu} + \frac{\ell\alpha}{\mu^2 B} \right) \log \frac{\mathcal{L}(\theta_0) - \mathcal{L}^*}{\epsilon}}_{\text{SGD rate (Lemma 4)}} \right)$$

*iterations of ZO-SGD we have  $\mathbb{E}[\mathcal{L}(\theta_t)] \leq \mathcal{L}^* + \epsilon$ .*

## 5 Related work

### 5.1 Zeroth-order optimization

Many classical lower bounds have been derived for ZO-SGD in the strongly convex and convex settings [45, 3, 76, 31, 81, 67] as well as non-convex [95]. These bounds generally depended on the number of parameters  $d$ . More recently, [94, 6, 14] showed that if the gradient has low-dimensional structure, then the query complexity scales linearly with the intrinsic dimension and logarithmically with the number of parameters, though the estimation has at least  $\Omega(sd \log d)$  memory cost. In this paper, we adapt [83] to be memory-efficient and we find that it can successfully fine-tune large LMs.

Many variants of ZO-SGD have been proposed. Sampling schedules [10] and other variance reduction methods [46, 60] can be added to ZO-SGD. Particularly salient applications of ZO to deep learning are distributed methods [88, 41] and black-box adversarial example generation [13, 61, 16, 62]. [101, 7] use ZO estimate of the Hessian to further enhance optimization along important directions. Additionally, there are ZO methods that optimize without estimating the gradient [36, 66, 42].

### 5.2 Memory-efficient backpropagation

Several algorithms have been proposed to efficiently approximate backpropagation by sparsifying gradients [87, 96], approximating Jacobians [1, 18], and subsampling the computational graph [68, 2]. However, these methods may accrue large approximation errors for deep networks. Gradient checkpointing [17] reduces memory cost of backpropagation by recomputing some activations but at a cost of significantly slower speed. FlashAttention [22] also reduces memory cost by recomputing attention matrices. Dettmers et al. [25, 26] explore quantization of large LMs’ weights and optimizer states, which leads to memory reduction in both training and inference.

### 5.3 Gradient-free adaptation of large language models

BBT and BBTv2 [86, 85] use evolutionary algorithms to achieve gradient-free optimization; however, due to its sensitivity to high dimensionality, BBT is limited to only optimize a low-dimension projection of prefixes and they focus on RoBERTa-large size models and few-shot settings. Other works in “black-box tuning” of LMs focus on optimizing discrete prompts without updating the model, either via reinforcement learning [15, 24, 28], ensemble [43], or iterative search [75].

## 6 Conclusion

We have shown that MeZO can effectively optimize large LMs across many tasks and scales. Further experiments suggest that MeZO can optimize non-differentiable objectives, which backpropagation usually cannot do. Our theory illustrates why MeZO is not catastrophically slow when tuning billions of parameters. As a limitation, MeZO takes many steps in order to achieve strong performance. In this work, we did not explore combining MeZO with other memory-efficient methods, such as FlashAttention [22] and quantization [25]. We hope to investigate this in the future.

We are excited to explore the applicability of MeZO to a number of promising areas, including but not limited to: pruning, distillation, saliency, interpretability, and dataset selection for fine-tuning. Non-differentiable objectives are a particularly exciting area, given recent advances in tuning large LMs to adapt to human feedback. Conducting theoretical analyses for how these efficient gradient estimates impact the performance of different applications are also of great interest.

## References

- [1] Hany S Abdel-Khalik, Paul D Hovland, Andrew Lyons, Tracy E Stover, and Jean Utke. A low rank approach to automatic differentiation. In *Advances in Automatic Differentiation*, pages 55–65, 2008.
- [2] Menachem Adelman, Kfir Levy, Ido Hakimi, and Mark Silberstein. Faster neural network training with approximate tensor operations. *Advances in Neural Information Processing Systems*, 34:27877–27889, 2021.
- [3] Alekh Agarwal, Peter L. Bartlett, Pradeep Ravikumar, and Martin J. Wainwright. Information-theoretic lower bounds on the oracle complexity of stochastic convex optimization. *IEEE Transactions on Information Theory*, 58(5):3235–3249, May 2012.
- [4] Armen Aghajanyan, Sonal Gupta, and Luke Zettlemoyer. Intrinsic dimensionality explains the effectiveness of language model fine-tuning. In *Proceedings of the 59th Annual Meeting of the Association for Computational Linguistics and the 11th International Joint Conference on Natural Language Processing (Volume 1: Long Papers)*, pages 7319–7328, 2021.
- [5] Stephen H Bach, Victor Sanh, Zheng-Xin Yong, Albert Webson, Colin Raffel, Nihal V Nayak, Abheesht Sharma, Taewoon Kim, M Saiful Bari, Thibault Fevry, et al. Promptsources: An integrated development environment and repository for natural language prompts. *arXiv preprint arXiv:2202.01279*, 2022.
- [6] Krishnakumar Balasubramanian and Saeed Ghadimi. Zeroth-order (non)-convex stochastic optimization via conditional gradient and gradient updates. In *Advances in Neural Information Processing Systems*, volume 31, 2018.
- [7] Krishnakumar Balasubramanian and Saeed Ghadimi. Zeroth-order nonconvex stochastic optimization: Handling constraints, high dimensionality, and saddle points. *Foundations of Computational Mathematics*, pages 1–42, 2022.
- [8] Roy Bar Haim, Ido Dagan, Bill Dolan, Lisa Ferro, Danilo Giampiccolo, Bernardo Magnini, and Idan Szpektor. The second PASCAL recognising textual entailment challenge. In *Proceedings of the Second PASCAL Challenges Workshop on Recognising Textual Entailment*, 2006.
- [9] Luisa Bentivogli, Peter Clark, Ido Dagan, and Danilo Giampiccolo. The fifth PASCAL recognizing textual entailment challenge. In *TAC*, 2009.
- [10] Raghu Bollapragada, Richard Byrd, and Jorge Nocedal. Adaptive sampling strategies for stochastic optimization. *SIAM Journal on Optimization*, 28(4):3312–3343, 2018.
- [11] Samuel R. Bowman, Gabor Angeli, Christopher Potts, and Christopher D. Manning. A large annotated corpus for learning natural language inference. In *Proceedings of the 2015 Conference on Empirical Methods in Natural Language Processing*, pages 632–642, 2015.
- [12] Tom Brown, Benjamin Mann, Nick Ryder, Melanie Subbiah, Jared D Kaplan, Prafulla Dhariwal, Arvind Neelakantan, Pranav Shyam, Girish Sastry, Amanda Askell, et al. Language models are few-shot learners. In *Advances in neural information processing systems*, volume 33, pages 1877–1901, 2020.
- [13] HanQin Cai, Yuchen Lou, Daniel McKenzie, and Wotao Yin. A zeroth-order block coordinate descent algorithm for huge-scale black-box optimization. In *International Conference on Machine Learning*, pages 1193–1203, 2021.
- [14] HanQin Cai, Daniel McKenzie, Wotao Yin, and Zhenliang Zhang. Zeroth-order regularized optimization (zoro): Approximately sparse gradients and adaptive sampling. *SIAM Journal on Optimization*, 32(2):687–714, 2022.
- [15] Yekun Chai, Shuohuan Wang, Yu Sun, Hao Tian, Hua Wu, and Haifeng Wang. Clip-tuning: Towards derivative-free prompt learning with a mixture of rewards. *arXiv preprint arXiv:2210.12050*, 2022.

- [16] Pin-Yu Chen, Huan Zhang, Yash Sharma, Jinfeng Yi, and Cho-Jui Hsieh. Zoo: Zeroth order optimization based black-box attacks to deep neural networks without training substitute models. In *Proceedings of the 10th ACM workshop on artificial intelligence and security*, pages 15–26, 2017.
- [17] Tianqi Chen, Bing Xu, Chiyuan Zhang, and Carlos Guestrin. Training deep nets with sublinear memory cost. *arXiv preprint arXiv:1604.06174*, 2016.
- [18] Krzysztof M Choromanski and Vikas Sindhwani. On blackbox backpropagation and jacobian sensing. In *Advances in Neural Information Processing Systems*, volume 30, 2017.
- [19] Paul F Christiano, Jan Leike, Tom Brown, Miljan Martic, Shane Legg, and Dario Amodei. Deep reinforcement learning from human preferences. In *Advances in neural information processing systems*, volume 30, 2017.
- [20] Christopher Clark, Kenton Lee, Ming-Wei Chang, Tom Kwiatkowski, Michael Collins, and Kristina Toutanova. BoolQ: Exploring the surprising difficulty of natural yes/no questions. In *Proceedings of the 2019 Conference of the North American Chapter of the Association for Computational Linguistics: Human Language Technologies, Volume 1 (Long and Short Papers)*, pages 2924–2936, 2019.
- [21] Ido Dagan, Oren Glickman, and Bernardo Magnini. The PASCAL recognising textual entailment challenge. In *the First International Conference on Machine Learning Challenges: Evaluating Predictive Uncertainty Visual Object Classification, and Recognizing Textual Entailment*, 2005.
- [22] Tri Dao, Dan Fu, Stefano Ermon, Atri Rudra, and Christopher Ré. Flashattention: Fast and memory-efficient exact attention with io-awareness. In *Advances in Neural Information Processing Systems*, volume 35, pages 16344–16359, 2022.
- [23] Marie-Catherine De Marneffe, Mandy Simons, and Judith Tonhauser. The commitmentbank: Investigating projection in naturally occurring discourse. In *Sinn und Bedeutung*, volume 23, pages 107–124, 2019.
- [24] Mingkai Deng, Jianyu Wang, Cheng-Ping Hsieh, Yihan Wang, Han Guo, Tianmin Shu, Meng Song, Eric Xing, and Zhiting Hu. RLPrompt: Optimizing discrete text prompts with reinforcement learning. In *Proceedings of the 2022 Conference on Empirical Methods in Natural Language Processing*, pages 3369–3391, 2022.
- [25] Tim Dettmers, Mike Lewis, Younes Belkada, and Luke Zettlemoyer. GPT3.int8(): 8-bit matrix multiplication for transformers at scale. In *Advances in Neural Information Processing Systems*, 2022.
- [26] Tim Dettmers, Mike Lewis, Sam Shleifer, and Luke Zettlemoyer. 8-bit optimizers via block-wise quantization. In *International Conference on Learning Representations*, 2022.
- [27] Jacob Devlin, Ming-Wei Chang, Kenton Lee, and Kristina Toutanova. BERT: Pre-training of deep bidirectional transformers for language understanding. In *Proceedings of the 2019 Conference of the North American Chapter of the Association for Computational Linguistics: Human Language Technologies, Volume 1 (Long and Short Papers)*, pages 4171–4186, 2019.
- [28] Shizhe Diao, Xuechun Li, Yong Lin, Zhichao Huang, and Tong Zhang. Black-box prompt learning for pre-trained language models. *arXiv preprint arXiv:2201.08531*, 2022.
- [29] Ning Ding, Yujia Qin, Guang Yang, Fuchao Wei, Zonghan Yang, Yusheng Su, Shengding Hu, Yulin Chen, Chi-Min Chan, Weize Chen, et al. Delta tuning: A comprehensive study of parameter efficient methods for pre-trained language models. *arXiv preprint arXiv:2203.06904*, 2022.
- [30] Dheeru Dua, Yizhong Wang, Pradeep Dasigi, Gabriel Stanovsky, Sameer Singh, and Matt Gardner. DROP: A reading comprehension benchmark requiring discrete reasoning over paragraphs. In *Proceedings of the 2019 Conference of the North American Chapter of the Association for Computational Linguistics: Human Language Technologies, Volume 1 (Long and Short Papers)*, pages 2368–2378, 2019.

- [31] John C. Duchi, Michael I. Jordan, Martin J. Wainwright, and Andre Wibisono. Optimal rates for zero-order convex optimization: The power of two function evaluations. *IEEE Transactions on Information Theory*, 61(5):2788–2806, 2015.
- [32] FairScale authors. Fairscale: A general purpose modular pytorch library for high performance and large scale training, 2021.
- [33] Tianyu Gao, Adam Fisch, and Danqi Chen. Making pre-trained language models better few-shot learners. In *Proceedings of the 59th Annual Meeting of the Association for Computational Linguistics and the 11th International Joint Conference on Natural Language Processing (Volume 1: Long Papers)*, pages 3816–3830, 2021.
- [34] Behrooz Ghorbani, Shankar Krishnan, and Ying Xiao. An investigation into neural net optimization via hessian eigenvalue density. In *International Conference on Machine Learning*, pages 2232–2241, 2019.
- [35] Danilo Giampiccolo, Bernardo Magnini, Ido Dagan, and Bill Dolan. The third PASCAL recognizing textual entailment challenge. In *the ACL-PASCAL Workshop on Textual Entailment and Paraphrasing*, 2007.
- [36] Daniel Golovin, John Karro, Greg Kochanski, Chansoo Lee, Xingyou Song, and Qiuyi Zhang. Gradientless descent: High-dimensional zeroth-order optimization. In *International Conference on Learning Representations*, 2020.
- [37] Priya Goyal, Piotr Dollár, Ross Girshick, Pieter Noordhuis, Lukasz Wesolowski, Aapo Kyrola, Andrew Tulloch, Yangqing Jia, and Kaiming He. Accurate, large minibatch sgd: Training imagenet in 1 hour. *arXiv preprint arXiv:1706.02677*, 2017.
- [38] Andreas Griewank and Andrea Walther. *Evaluating derivatives: principles and techniques of algorithmic differentiation*. SIAM, 2008.
- [39] José Grimm, Loïc Pottier, and Nicole Rostaing-Schmidt. *Optimal time and minimum space-time product for reversing a certain class of programs*. PhD thesis, INRIA, 1996.
- [40] Suchin Gururangan, Ana Marasović, Swabha Swayamdipta, Kyle Lo, Iz Beltagy, Doug Downey, and Noah A. Smith. Don’t stop pretraining: Adapt language models to domains and tasks. In *Proceedings of the 58th Annual Meeting of the Association for Computational Linguistics*, pages 8342–8360, 2020.
- [41] Davood Hajinezhad and Michael M Zavlanos. Gradient-free multi-agent nonconvex nonsmooth optimization. In *2018 IEEE Conference on Decision and Control (CDC)*, pages 4939–4944, 2018.
- [42] Geoffrey Hinton. The forward-forward algorithm: Some preliminary investigations. *arXiv preprint arXiv:2212.13345*, 2022.
- [43] Bairu Hou, Joe O’Connor, Jacob Andreas, Shiyu Chang, and Yang Zhang. Promptboosting: Black-box text classification with ten forward passes. *arXiv preprint arXiv:2212.09257*, 2022.
- [44] Edward J Hu, yelong shen, Phillip Wallis, Zeyuan Allen-Zhu, Yanzhi Li, Shean Wang, Lu Wang, and Weizhu Chen. LoRA: Low-rank adaptation of large language models. In *International Conference on Learning Representations*, 2022.
- [45] Kevin G Jamieson, Robert Nowak, and Ben Recht. Query complexity of derivative-free optimization. In *Advances in Neural Information Processing Systems*, volume 25, 2012.
- [46] Kaiyi Ji, Zhe Wang, Yi Zhou, and Yingbin Liang. Improved zeroth-order variance reduced algorithms and analysis for nonconvex optimization. In *International conference on machine learning*, pages 3100–3109, 2019.
- [47] Rie Johnson and Tong Zhang. Accelerating stochastic gradient descent using predictive variance reduction. In C.J. Burges, L. Bottou, M. Welling, Z. Ghahramani, and K.Q. Weinberger, editors, *Advances in Neural Information Processing Systems*, volume 26, 2013.

- 447 [48] Hamed Karimi, Julie Nutini, and Mark Schmidt. Linear convergence of gradient and proximal-  
448 gradient methods under the polyak-łojasiewicz condition, 2020.
- 449 [49] Daniel Khashabi, Snigdha Chaturvedi, Michael Roth, Shyam Upadhyay, and Dan Roth. Look-  
450 ing beyond the surface: A challenge set for reading comprehension over multiple sentences.  
451 In *Proceedings of the 2018 Conference of the North American Chapter of the Association for*  
452 *Computational Linguistics: Human Language Technologies, Volume 1 (Long Papers)*, pages  
453 252–262, 2018.
- 454 [50] Diederik P Kingma and Jimmy Ba. Adam: A method for stochastic optimization. In *International*  
455 *Conference on Learning Representations*, 2015.
- 456 [51] Ananya Kumar, Aditi Raghunathan, Robbie Matthew Jones, Tengyu Ma, and Percy Liang. Fine-  
457 tuning can distort pretrained features and underperform out-of-distribution. In *International*  
458 *Conference on Learning Representations*, 2022.
- 459 [52] Brian Lester, Rami Al-Rfou, and Noah Constant. The power of scale for parameter-efficient  
460 prompt tuning. In *Proceedings of the 2021 Conference on Empirical Methods in Natural*  
461 *Language Processing*, pages 3045–3059, 2021.
- 462 [53] Hector Levesque, Ernest Davis, and Leora Morgenstern. The winograd schema challenge.  
463 In *Thirteenth international conference on the principles of knowledge representation and*  
464 *reasoning*, 2012.
- 465 [54] Chunyuan Li, Heerad Farkhor, Rosanne Liu, and Jason Yosinski. Measuring the intrinsic  
466 dimension of objective landscapes. In *International Conference on Learning Representations*,  
467 2018.
- 468 [55] Xiang Lisa Li and Percy Liang. Prefix-tuning: Optimizing continuous prompts for generation.  
469 In *Proceedings of the 59th Annual Meeting of the Association for Computational Linguistics*  
470 *and the 11th International Joint Conference on Natural Language Processing (Volume 1: Long*  
471 *Papers)*, pages 4582–4597, 2021.
- 472 [56] Zhiyuan Li, Sadhika Malladi, and Sanjeev Arora. On the validity of modeling SGD with  
473 stochastic differential equations (SDEs). In A. Beygelzimer, Y. Dauphin, P. Liang, and  
474 J. Wortman Vaughan, editors, *Advances in Neural Information Processing Systems*, 2021.
- 475 [57] Zhiyuan Li, Srinadh Bhojanapalli, Manzil Zaheer, Sashank Reddi, and Sanjiv Kumar. Robust  
476 training of neural networks using scale invariant architectures. In *International Conference on*  
477 *Machine Learning*, pages 12656–12684, 2022.
- 478 [58] Jiachang Liu, Dinghan Shen, Yizhe Zhang, Bill Dolan, Lawrence Carin, and Weizhu Chen.  
479 What makes good in-context examples for GPT-3? In *Proceedings of Deep Learning Inside*  
480 *Out (DeeLIO 2022): The 3rd Workshop on Knowledge Extraction and Integration for Deep*  
481 *Learning Architectures*, pages 100–114, 2022.
- 482 [59] Liyuan Liu, Xiaodong Liu, Jianfeng Gao, Weizhu Chen, and Jiawei Han. Understanding  
483 the difficulty of training transformers. In *Proceedings of the 2020 Conference on Empirical*  
484 *Methods in Natural Language Processing (EMNLP)*, pages 5747–5763, 2020.
- 485 [60] Sijia Liu, Bhavya Kailkhura, Pin-Yu Chen, Paishun Ting, Shiyu Chang, and Lisa Amini.  
486 Zeroth-order stochastic variance reduction for nonconvex optimization. In *Advances in Neural*  
487 *Information Processing Systems*, volume 31, 2018.
- 488 [61] Sijia Liu, Pin-Yu Chen, Xiangyi Chen, and Mingyi Hong. signSGD via zeroth-order oracle. In  
489 *International Conference on Learning Representations*, 2019.
- 490 [62] Sijia Liu, Pin-Yu Chen, Bhavya Kailkhura, Gaoyuan Zhang, Alfred O Hero III, and Pramod K  
491 Varshney. A primer on zeroth-order optimization in signal processing and machine learning:  
492 Principals, recent advances, and applications. *IEEE Signal Processing Magazine*, 37(5):43–54,  
493 2020.

- [63] Yinhan Liu, Myle Ott, Naman Goyal, Jingfei Du, Mandar Joshi, Danqi Chen, Omer Levy, Mike Lewis, Luke Zettlemoyer, and Veselin Stoyanov. Roberta: A robustly optimized bert pretraining approach. *arXiv preprint arXiv:1907.11692*, 2019.
- [64] Yao Lu, Max Bartolo, Alastair Moore, Sebastian Riedel, and Pontus Stenetorp. Fantastically ordered prompts and where to find them: Overcoming few-shot prompt order sensitivity. In *Proceedings of the 60th Annual Meeting of the Association for Computational Linguistics (Volume 1: Long Papers)*, pages 8086–8098, 2022.
- [65] Sadhika Malladi, Alexander Wettig, Dingli Yu, Danqi Chen, and Sanjeev Arora. A kernel-based view of language model fine-tuning. *arXiv preprint arXiv:2210.05643*, 2022.
- [66] Horia Mania, Aurelia Guy, and Benjamin Recht. Simple random search of static linear policies is competitive for reinforcement learning. In *Advances in Neural Information Processing Systems*, volume 31, 2018.
- [67] Arkadij Semenovič Nemirovskij and David Borisovich Yudin. Problem complexity and method efficiency in optimization. 1983.
- [68] Deniz Oktay, Nick McGreivy, Joshua Aduol, Alex Beatson, and Ryan P Adams. Randomized automatic differentiation. *arXiv preprint arXiv:2007.10412*, 2020.
- [69] OpenAI. Gpt-4 technical report. *arXiv preprint arXiv:2303.08774*, 2023.
- [70] Long Ouyang, Jeffrey Wu, Xu Jiang, Diogo Almeida, Carroll Wainwright, Pamela Mishkin, Chong Zhang, Sandhini Agarwal, Katarina Slama, Alex Ray, et al. Training language models to follow instructions with human feedback. *Advances in Neural Information Processing Systems*, 35:27730–27744, 2022.
- [71] Vardan Papayan. The full spectrum of deepnet Hessians at scale: Dynamics with sgd training and sample size. *arXiv preprint arXiv:1811.07062*, 2018.
- [72] Vardan Papayan. Traces of class/cross-class structure pervade deep learning spectra. *Journal of Machine Learning Research*, 21(252):1–64, 2020.
- [73] Adam Paszke, Sam Gross, Francisco Massa, Adam Lerer, James Bradbury, Gregory Chanan, Trevor Killeen, Zeming Lin, Natalia Gimelshein, Luca Antiga, Alban Desmaison, Andreas Kopf, Edward Yang, Zachary DeVito, Martin Raison, Alykhan Tejani, Sasank Chilamkurthy, Benoit Steiner, Lu Fang, Junjie Bai, and Soumith Chintala. Pytorch: An imperative style, high-performance deep learning library. In *Advances in Neural Information Processing Systems 32*, pages 8024–8035. 2019.
- [74] Mohammad Taher Pilehvar and Jose Camacho-Collados. WiC: the word-in-context dataset for evaluating context-sensitive meaning representations. In *Proceedings of the 2019 Conference of the North American Chapter of the Association for Computational Linguistics: Human Language Technologies, Volume 1 (Long and Short Papers)*, pages 1267–1273, 2019.
- [75] Archiki Prasad, Peter Hase, Xiang Zhou, and Mohit Bansal. Grips: Gradient-free, edit-based instruction search for prompting large language models. *arXiv preprint arXiv:2203.07281*, 2022.
- [76] Maxim Raginsky and Alexander Rakhlin. Information-based complexity, feedback and dynamics in convex programming. *IEEE Transactions on Information Theory*, 57(10):7036–7056, 2011.
- [77] Pranav Rajpurkar, Jian Zhang, Konstantin Lopyrev, and Percy Liang. SQuAD: 100,000+ questions for machine comprehension of text. In *Proceedings of the 2016 Conference on Empirical Methods in Natural Language Processing*, pages 2383–2392, 2016.
- [78] Melissa Roemmele, Cosmin Adrian Bejan, and Andrew S Gordon. Choice of plausible alternatives: An evaluation of commonsense causal reasoning. 2011.
- [79] Levent Sagun, Utku Evci, V Ugur Guney, Yann Dauphin, and Leon Bottou. Empirical analysis of the hessian of over-parametrized neural networks. *arXiv preprint arXiv:1706.04454*, 2017.



- [80] Timo Schick and Hinrich Schütze. Exploiting cloze-questions for few-shot text classification and natural language inference. In *Proceedings of the 16th Conference of the European Chapter of the Association for Computational Linguistics: Main Volume*, pages 255–269, 2021.
- [81] Ohad Shamir. An optimal algorithm for bandit and zero-order convex optimization with two-point feedback. *The Journal of Machine Learning Research*, 18(1):1703–1713, 2017.
- [82] Richard Socher, Alex Perelygin, Jean Wu, Jason Chuang, Christopher D. Manning, Andrew Ng, and Christopher Potts. Recursive deep models for semantic compositionality over a sentiment treebank. In *Proceedings of the 2013 Conference on Empirical Methods in Natural Language Processing*, 2013.
- [83] J.C. Spall. Multivariate stochastic approximation using a simultaneous perturbation gradient approximation. *IEEE Transactions on Automatic Control*, 37(3):332–341, 1992.
- [84] Nisan Stiennon, Long Ouyang, Jeffrey Wu, Daniel Ziegler, Ryan Lowe, Chelsea Voss, Alec Radford, Dario Amodei, and Paul F Christiano. Learning to summarize with human feedback. In *Advances in Neural Information Processing Systems*, volume 33, pages 3008–3021, 2020.
- [85] Tianxiang Sun, Zhengfu He, Hong Qian, Yunhua Zhou, Xuanjing Huang, and Xipeng Qiu. BBTv2: Towards a gradient-free future with large language models. In *Proceedings of the 2022 Conference on Empirical Methods in Natural Language Processing*, pages 3916–3930, 2022.
- [86] Tianxiang Sun, Yunfan Shao, Hong Qian, Xuanjing Huang, and Xipeng Qiu. Black-box tuning for language-model-as-a-service. In *International Conference on Machine Learning*, pages 20841–20855, 2022.
- [87] Xu Sun, Xuancheng Ren, Shuming Ma, and Houfeng Wang. meProp: Sparsified back propagation for accelerated deep learning with reduced overfitting. In *Proceedings of the 34th International Conference on Machine Learning*, volume 70, pages 3299–3308, 2017.
- [88] Yujie Tang and Na Li. Distributed zero-order algorithms for nonconvex multi-agent optimization. In *2019 57th Annual Allerton Conference on Communication, Control, and Computing (Allerton)*, pages 781–786, 2019.
- [89] Zhiwei Tang, Dmitry Rybin, and Tsung-Hui Chang. Zeroth-order optimization meets human feedback: Provable learning via ranking oracles, 2023.
- [90] Ashish Vaswani, Noam Shazeer, Niki Parmar, Jakob Uszkoreit, Llion Jones, Aidan N Gomez, Łukasz Kaiser, and Illia Polosukhin. Attention is all you need. In *Advances in neural information processing systems*, volume 30, 2017.
- [91] Ellen M Voorhees and Dawn M Tice. Building a question answering test collection. In *the 23rd annual international ACM SIGIR conference on Research and development in information retrieval*, 2000.
- [92] Alex Wang, Yada Pruksachatkun, Nikita Nangia, Amanpreet Singh, Julian Michael, Felix Hill, Omer Levy, and Samuel Bowman. Superglue: A stickier benchmark for general-purpose language understanding systems. In *Advances in neural information processing systems*, volume 32, 2019.
- [93] Chong Wang, Xi Chen, Alexander J Smola, and Eric P Xing. Variance reduction for stochastic gradient optimization. In C.J. Burges, L. Bottou, M. Welling, Z. Ghahramani, and K.Q. Weinberger, editors, *Advances in Neural Information Processing Systems*, volume 26. Curran Associates, Inc., 2013.
- [94] Yining Wang, Simon Du, Sivaraman Balakrishnan, and Aarti Singh. Stochastic zeroth-order optimization in high dimensions. In *Proceedings of the Twenty-First International Conference on Artificial Intelligence and Statistics*, volume 84, pages 1356–1365, 2018.

- 589 [95] Zhongruo Wang, Krishnakumar Balasubramanian, Shiqian Ma, and Meisam Razaviyayn.  
590 Zeroth-order algorithms for nonconvex minimax problems with improved complexities. *arXiv*  
591 *preprint arXiv:2001.07819*, 2020.
- 592 [96] Bingzhen Wei, Xu Sun, Xuancheng Ren, and Jingjing Xu. Minimal effort back propagation  
593 for convolutional neural networks. *arXiv preprint arXiv:1709.05804*, 2017.
- 594 [97] Adina Williams, Nikita Nangia, and Samuel Bowman. A broad-coverage challenge corpus  
595 for sentence understanding through inference. In *Proceedings of the 2018 Conference of the*  
596 *North American Chapter of the Association for Computational Linguistics: Human Language*  
597 *Technologies, Volume 1 (Long Papers)*, 2018.
- 598 [98] Thomas Wolf, Lysandre Debut, Victor Sanh, Julien Chaumond, Clement Delangue, Anthony  
599 Moi, Pierric Cistac, Tim Rault, Remi Louf, Morgan Funtowicz, Joe Davison, Sam Shleifer,  
600 Patrick von Platen, Clara Ma, Yacine Jernite, Julien Plu, Canwen Xu, Teven Le Scao, Sylvain  
601 Gugger, Mariama Drame, Quentin Lhoest, and Alexander Rush. Transformers: State-of-the-art  
602 natural language processing. In *Proceedings of the 2020 Conference on Empirical Methods in*  
603 *Natural Language Processing: System Demonstrations*, pages 38–45, 2020.
- 604 [99] Yikai Wu, Xingyu Zhu, Chenwei Wu, Annie Wang, and Rong Ge. Dissecting hessian: Under-  
605 standing common structure of hessian in neural networks. *arXiv preprint arXiv:2010.04261*,  
606 2020.
- 607 [100] Zhewei Yao, Amir Gholami, Kurt Keutzer, and Michael W Mahoney. Pyhessian: Neural  
608 networks through the lens of the hessian. In *2020 IEEE international conference on big data*  
609 *(Big data)*, pages 581–590, 2020.
- 610 [101] Haishan Ye, Zhichao Huang, Cong Fang, Chris Junchi Li, and Tong Zhang. Hessian-aware  
611 zeroth-order optimization for black-box adversarial attack. *arXiv preprint arXiv:1812.11377*,  
612 2018.
- 613 [102] Yang You, Igor Gitman, and Boris Ginsburg. Large batch training of convolutional networks.  
614 *arXiv preprint arXiv:1708.03888*, 2017.
- 615 [103] Yang You, Jing Li, Sashank Reddi, Jonathan Hseu, Sanjiv Kumar, Srinadh Bhojanapalli,  
616 Xiaodan Song, James Demmel, Kurt Keutzer, and Cho-Jui Hsieh. Large batch optimization  
617 for deep learning: Training bert in 76 minutes. *arXiv preprint arXiv:1904.00962*, 2019.
- 618 [104] Sheng Zhang, Xiaodong Liu, Jingjing Liu, Jianfeng Gao, Kevin Duh, and Benjamin Van Durme.  
619 Record: Bridging the gap between human and machine commonsense reading comprehension.  
620 *arXiv preprint arXiv:1810.12885*, 2018.
- 621 [105] Susan Zhang, Stephen Roller, Naman Goyal, Mikel Artetxe, Moya Chen, Shuohui Chen,  
622 Christopher Dewan, Mona Diab, Xian Li, Xi Victoria Lin, et al. Opt: Open pre-trained  
623 transformer language models. *arXiv preprint arXiv:2205.01068*, 2022.

## A Algorithmic Ablations

We perform a number of ablations to select the best algorithm. As is standard in ZO literature, we consider the main computational cost to be the number of forward passes. In our case, the number of forward passes can be affected by the number of gradient steps taken, any usage of gradient accumulation, and using more noise samples to reduce the variance of the gradient estimate.

We observed that the performance of MeZO improves monotonically with the number of steps, and there does not appear to be any overfitting. Hence, when performing algorithmic ablations, we can focus on the efficiency of different algorithms without considering implicit bias. This is also reflected in our theoretical analysis. To ease the computational load, we fix the number of forward passes to 10,000 and compare many different algorithms for RoBERTa-large on a smaller set of tasks that span sentiment analysis, entailment, and topic classification: SST-2, SNLI, and TREC. We emphasize that 10,000 is a small budget and is only used as a setting to compare these ZO algorithms to each other. We find that using a linearly decreasing learning rate schedule during training, as was done for fine-tuning with backpropagation in [63], does not help or hurt MeZO. Similarly, using a learning rate warmup leads to identical results on these three tasks. For simplicity, we use a constant learning rate schedule with no warmup for all of the below experiments. We perform few-shot experiments with  $k = 16$  and average the results across 5 seeds.

| Experiment | Hyperparameters | Values                        |
|------------|-----------------|-------------------------------|
| MeZO       | Batch size      | $\{16, 64\} \times$           |
|            | Learning rate   | $\{1e-5, 1e-6, 1e-7\} \times$ |
|            | $\epsilon$      | $\{1e-3, 1e-5\} \times$       |
|            | Weight Decay    | $\{0, 0.1\}$                  |

Table 4: The hyperparameter grid used in our ablation experiments. For simplicity, we use a constant learning rate schedule.

### A.1 Prompting

We study if adding a prompt is crucial to the ability of MeZO to optimize the network. We use prompts from Gao et al. [33]. Malladi et al. [65] claimed the prompt makes the optimization trajectory well-behaved, though we note that the current paper considers RoBERTa-large and large autoregressive models while the previous work only studied RoBERTa-base. We note the similarity between kernel behavior and our theoretical setting in Section 4. MeZO succeeds on tasks that are reported to not exhibit kernel behavior in Malladi et al. [65], so we investigate whether or not the prompt is necessary.

|           | SST-2      | SNLI       | TREC       |
|-----------|------------|------------|------------|
| Prompt    | 89.6 (1.2) | 65.1 (6.2) | 66.7 (6.2) |
| No Prompt | 51.9 (2.9) | 34.8 (2.1) | 19.5 (9.0) |

Table 5: Experiments using MeZO to fine-tune models with and without a prompt.

Both experiments followed the grid in Table 4, but we also expanded the grid to include a learning rate of  $1e-4$  for the no prompt case. As a result of these experiments, we fix the setting to prompt-based fine-tuning for all of the below experiments.

### A.2 Sample Schedules

One can sample  $n_t$  noise vectors at the  $t$ th step and use  $n_t$ -SPSA to compute the gradient estimate. Similar ideas were proposed in Bollapragada et al. [10], Cai et al. [14]. We study the effect of linearly increasing and constant sampling schedules in the ablation setting. The intuition for the linearly increasing schedule is that the optimizer may need a higher fidelity gradient as it approaches the minimum. Increasing the number of  $z$ s can speed up optimization by reducing the gradient variance, but doing so also increases the number of forward passes required for each optimization step, so there is a trade-off to study. We note that increasing the number of  $z$ s should be accompanied by

a proportional scaling of the learning rate, analogous to the linear scaling rule proposed in [37] (theoretical justification can follow the SDE technique [56]). Table 6 shows no consistent benefit in one schedule over the other, and it demonstrates that increasing the  $n$  in  $n$ -SPSA while fixing the number of forward passes allowed results in only marginal gains at best.

| $n$      | Schedule | SST-2             | SNLI              | TREC              |
|----------|----------|-------------------|-------------------|-------------------|
| $n = 1$  | Constant | 89.6 (1.2)        | 65.1 (6.2)        | <b>66.7 (6.2)</b> |
| $n = 4$  | Constant | 89.5 (1.1)        | <b>68.6 (3.2)</b> | 62.3 (5.6)        |
| $n = 4$  | Linear   | 89.6 (1.4)        | 65.3 (6.4)        | 66.1 (5.5)        |
| $n = 16$ | Constant | <b>90.4 (0.7)</b> | 67.0 (3.4)        | 62.8 (6.3)        |
| $n = 16$ | Linear   | 88.9 (1.2)        | 62.8 (5.9)        | 64.2 (5.3)        |

Table 6: Experiments using MeZO with different schedules for  $n$ . We scale the learning rate proportionally to the number of  $z$ ’s sampled.

## B MeZO Variants

There is a rich history of transferring ideas from first order optimization to enhance ZO algorithms. Below, we highlight several variants of MeZO that did not achieve as high performance as the algorithm presented in Algorithm 1.

### B.1 Memory-efficient $n$ -SPSA

We highlight how MeZO can perform  $n$ -SPSA (Definition 1) efficiently for  $n > 1$  in Algorithm 2. In particular, if sampling  $n$   $z$  vectors and averaging the projected gradients, we require storing  $2n$  additional scalars: the random seeds and the projected gradients. The same caveat about perturbing individual weights versus entire weight matrices still applies here (see Section 2).

### B.2 Augmenting MeZO with Gradient History

The  $n$ -SPSA algorithm merely provides a gradient estimate that can subsequently be used in place of the gradient in any gradient-based optimizer. Many popular optimizers, such as Adam and SGD with momentum, require storing some historical information about gradients (e.g., a moving average). This requirement causes such algorithms to require  $2\times$  or  $3\times$  the memory that is needed for SGD.

However, one advantage of MeZO is that the gradient history can be recomputed at each step without requiring much additional memory. In reference to Algorithm 1, note that the gradient only needs `projected_grad` and the random seed  $s$  used to compute the perturbation  $z$ . `projected_grad` can be recomputed from the two perturbed losses  $\ell_1$  and  $\ell_2$ , so we need to only store 3 scalars per step to reproduce the gradient history (i.e., up to  $3T$  scalars during training). This is a substantial reduction in added memory overhead that is usually needed for using Adam or momentum instead of vanilla SGD.

Table 16 illustrates that MeZO-Adam can sometimes improve the performance of MeZO, though each gradient step requires additional computation (but no additional forward passes). We leave it to future work to investigate when MeZO-Adam may be more useful than MeZO.

| Experiment | Hyperparameters | Values                             |
|------------|-----------------|------------------------------------|
| MeZO-Adam  | Batch size      | 64                                 |
|            | Learning rate   | $\{1e-6, 1e-5, 1e-4, 5e-4, 1e-3\}$ |
|            | $\epsilon$      | $1e-3$                             |
|            | Weight Decay    | 0                                  |

Table 7: The hyperparameter grid used for MeZO-Adam. For simplicity, we use a constant learning rate schedule.

---

**Algorithm 2:** MeZO with  $n > 1$ 

---

**Require:** parameters  $\theta \in \mathbb{R}^d$ , loss  $\mathcal{L} : \mathbb{R}^d \rightarrow \mathbb{R}$ , step budget  $T$ , perturbation scale  $\epsilon$ , batch size  $B$ , learning rate schedule  $\{\eta_t\}$ ,  $n$  for  $n$ -SPSA estimate (Definition 1)

```
for  $t = 1, \dots, T$  do
  seeds, projected_grads  $\leftarrow []$  ▷ Will each contain  $n$  scalars
  for  $j = 1, \dots, n$  do
    Sample batch  $\mathcal{B} \subset \mathcal{D}^B$  and random seed  $s$ 
     $\theta \leftarrow \text{PerturbParameters}(\theta, \epsilon, s)$ 
     $\ell_+ \leftarrow \mathcal{L}(\theta; \mathcal{B})$ 
     $\theta \leftarrow \text{PerturbParameters}(\theta, -2\epsilon, s)$ 
     $\ell_- \leftarrow \mathcal{L}(\theta; \mathcal{B})$ 
     $\theta \leftarrow \text{PerturbParameters}(\theta, \epsilon, s)$  ▷ Reset parameters
    projected_grad  $\leftarrow (\ell_+ - \ell_-)/(2\epsilon)$ 
    projected_grads[j]  $\leftarrow$  projected_grad
    seeds[j]  $\leftarrow s$ 
  end
  for  $j = 1, \dots, n$  do
    Reset random number generator with seed seeds[j]
    for  $\theta_i \in \theta$  do
       $z \sim \mathcal{N}(0, 1)$ 
       $\theta_i \leftarrow \theta_i - (\eta_t/n) * \text{projected\_grads}[j] * z$  ▷ Avg grad for  $z_1, \dots, z_n$ 
    end
  end
end
end

Subroutine  $\text{PerturbParameters}(\theta, \epsilon, s)$ 
  Reset random number generator with seed  $s$  ▷ For sampling  $z$ 
  for  $\theta_i \in \theta$  do
     $z \sim \mathcal{N}(0, 1)$ 
     $\theta_i \leftarrow \theta_i + \epsilon z$  ▷ Modify parameters in place
  end
  return  $\theta$ 
```

---

### 687 B.3 Modifying the Variance of MeZO

688 Our theory in Section 4 sketches the well-known fact that the variance of the stochastic gradient  
689 estimate can impact the rate of optimization. ZO methods can be combined with standard variance  
690 reduction techniques to possibly improve optimization speed. For example, Liu et al. [60] designed a  
691 variance reduced ZO algorithm, analogous to SVRG [47], to improve the speed of convergence. Below,  
692 we show that several variance reduction methods (e.g., using the gradient norm) can be implemented  
693 in a memory-efficient manner. However, when controlling for the total budget of forward passes (i.e.,  
694 function queries), these methods are not as performant as MeZO. We nevertheless present them to  
695 demonstrate the ease with which MeZO can be adapted, and we suggest these methods may be useful  
696 for optimizing more complex objectives.

697 First, we define a general SPSA estimate that has the same expectation (i.e., the true gradient) but has  
698 a scaled variance.

699 **Definition 6** (Variance-Modified SPSA). *Given a matrix  $D = \text{diag}(\mathbf{d})$ , the variance modified SPSA*  
700 *computes*

$$\tilde{\nabla} \mathcal{L}(\theta; \mathcal{B}) = \frac{\mathcal{L}(\theta + \epsilon(\mathbf{d}^{-1} \odot \mathbf{z}); \mathcal{B}) - \mathcal{L}(\theta - \epsilon(\mathbf{d}^{-1} \odot \mathbf{z}); \mathcal{B})}{2\epsilon} (\mathbf{d} \odot \mathbf{z})$$

701 where  $\mathbf{d} \in \mathbb{R}^d$  has nonzero entries and  $\mathbf{d}^{-1}$  denotes the coordinatewise reciprocal.

702 The above SPSA variant is an unbiased estimator of the gradient, because  $\mathbb{E}[\tilde{\nabla} \mathcal{L}(\theta; \mathcal{B})] =$   
703  $\mathbb{E}[D^{-1} \mathbf{z} \mathbf{z}^\top D \nabla \mathcal{L}(\theta; \mathcal{B})] = \mathbb{E}[\nabla \mathcal{L}(\theta; \mathcal{B})]$ . We will draw inspiration from classical methods (i.e.,  
704 “control variates”) and choose  $\mathbf{d}$  to be a block vector with gradient norms or parameter norms [93].

To select the parameter groups, we split the model by layer, keeping the embedding and the head separate (i.e., RoBERTa-large has  $24 + 2 = 26$  parameter groups). It is straightforward to measure the parameter norms without consuming additional memory. We can measure the gradient norms without performing backpropagation, as shown below.

**Proposition 1** (ZO Estimate of Gradient Norm of  $\ell$ th Layer). *Define  $\mathbf{z}_\ell$  to have  $z \sim \mathcal{N}(0, 1)$  in each coordinate corresponding to parameters in the  $\ell$ th layer and 0 everywhere else. Then, we can estimate the norm of the gradient of the loss w.r.t. the  $\ell$ th layer  $\nabla_{\theta_\ell}$  as*

$$\|\nabla_{\theta_\ell} \mathcal{L}(\theta; \mathcal{B})\|_2 \approx \left| \frac{\mathcal{L}(\theta + \epsilon \mathbf{z}_\ell; \mathcal{B}) - \mathcal{L}(\theta - \epsilon \mathbf{z}_\ell; \mathcal{B})}{2\epsilon} \right|$$

709

As is true for SPSA, increasing the number of  $\mathbf{z}_\ell$ ’s sampled for each value of  $\ell$  and averaging the result reduces the variance of the estimate. The rationale for this estimate is that for any vector  $\mathbf{v}$ ,  $\mathbb{E}_{\mathbf{z}}[(\langle \mathbf{v}, \mathbf{z} \rangle)^2] = \|\mathbf{v}\|_2^2$  for Gaussian  $\mathbf{z}$ . It is clear that this estimate can be computed in a memory efficient way, although it requires  $2L$  forward passes to compute gradient norms for  $L$  parameter groups.

We show the experimental results for modifying the variance below. We follow the ablation setting and use a fixed budget of 10,000 steps (Appendix A). Generally, using the gradient norm to reduce the variance substantially hurts performance (Table 8). If we “cheat” and allow one backpropagation through the network to estimate the gradient norm, then we see that reducing the variance using the gradient norm does not substantially hurt or help performance. Modifying the variance using the parameter norm, analogous to layerwise adaptive rate methods, does not substantially impact the performance of MeZO (Table 9).

Our observation is that decreasing the variance by setting  $\mathbf{d}$  as the gradient norm does not improve optimization. This empirical result agrees with the exposition in Section 4 that the straightforward variance analysis (which yields a dependence on the number of parameters  $d$ ) is not the best lens to study the rate of optimization when fine-tuning with MeZO. Our effective rank view in Theorem 1 and Lemma 3 is likely a better characterization of fine-tuning dynamics. We leave it to future work to explore if these methods can be useful for other more complex objectives.

| Recompute $\mathbf{d}$      | ZO estimate of $\mathbf{d}$ | SST-2       | SNLI       | TREC       |
|-----------------------------|-----------------------------|-------------|------------|------------|
| Baseline MeZO (Algorithm 1) |                             | 89.6 (1.2)  | 65.1 (6.2) | 66.7 (6.2) |
| ×                           | ×                           | 89.7 (0.8)  | 65.2 (5.2) | 64.3 (6.4) |
| ×                           | ✓                           | 87.0 (2.5)  | 49.6 (9.2) | 32.6 (7.7) |
| ✓                           | ✓                           | 79.0 (10.3) | 48.9 (2.2) | 38.7 (7.5) |

Table 8: Experiments modifying the variance of MeZO using  $\mathbf{d}$  as the gradient norm (see Definition 6). We sometimes recompute  $\mathbf{d}$  at the start of each epoch or use Proposition 1 to estimate  $\mathbf{d}$  without requiring backpropagation.

| Recompute $\mathbf{d}$      | SST-2      | SNLI       | TREC       |
|-----------------------------|------------|------------|------------|
| Baseline MeZO (Algorithm 1) | 89.6 (1.2) | 65.1 (6.2) | 66.7 (6.2) |
| ×                           | 89.2 (2.1) | 65.4 (4.2) | 64.8 (5.6) |
| ✓                           | 88.2 (4.7) | 65.2 (4.0) | 64.7 (5.5) |

Table 9: Experiments modifying the variance of MeZO using  $\mathbf{d}$  as the parameter norm (see Definition 6). We sometimes recompute  $\mathbf{d}$  at the start of each epoch.

## 728 B.4 Modifying the Expectation of MeZO

The above experiments show that modifying the variance of MeZO cannot consistently accelerate its convergence. However, a simple modification of Definition 6 allows us to change the expectation of MeZO as well. This can be used to efficiently estimate coordinate-wise normalized gradient-based optimizer updates (e.g., Adam).



733 **Definition 7** (Expectation-Modified SPSA). *Given a matrix  $D = \text{diag}(\mathbf{d})$ , the variance modified*  
734 *SPSA computes*

$$\tilde{\nabla} \mathcal{L}(\boldsymbol{\theta}; \mathcal{B}) = \frac{\mathcal{L}(\boldsymbol{\theta} + \epsilon(\mathbf{d}^{-1} \odot \mathbf{z}); \mathcal{B}) - \mathcal{L}(\boldsymbol{\theta} - \epsilon(\mathbf{d}^{-1} \odot \mathbf{z}); \mathcal{B})}{2\epsilon} \mathbf{z}$$

735 where  $\mathbf{d} \in \mathbb{R}^d$ .

736 Now, we see that  $\tilde{\nabla} \mathcal{L}(\boldsymbol{\theta}; \mathcal{B}) = \mathbb{E}[D^{-1} \mathbf{z} \mathbf{z}^\top \nabla \mathcal{L}(\boldsymbol{\theta}; \mathcal{B})]$  so the SPSA estimate is no longer an unbiased  
737 estimator for  $\nabla \mathcal{L}(\boldsymbol{\theta})$ . If we choose  $\mathbf{d}$  to be the gradient norm, for example, then SPSA can estimate  
738 the normalized gradient. Concurrent work in Tang et al. [89] gives another ZO estimate of the  
739 normalized gradient while assuming access to only rankings of inputs (instead of the noisy function  
740 evaluations available in our setting). We find that estimating the normalized gradient does not perform  
741 as well as directly estimating the gradient (Table 10). Regardless, we present this algorithm as a way  
742 to highlight that any coordinate-wise operation to the gradient can be applied in a memory-efficient  
743 manner.

| Method                                         | SST-2      | SNLI       | TREC        |
|------------------------------------------------|------------|------------|-------------|
| Baseline MeZO (Algorithm 1)                    | 89.6 (1.2) | 65.1 (6.2) | 66.7 (6.2)  |
| Estimate of normalized gradient (Definition 7) | 88.0 (1.2) | 60.0 (2.4) | 44.0 (14.0) |

Table 10: Experiments modifying the expectation of MeZO using  $\mathbf{d}$  as the gradient norm (see Definition 7). We use the ZO estimate of the gradient norm (Proposition 1).

## 744 C Memory Analysis

745 The compute-memory tradeoff of backpropagation is complex to analyze. Griewank and Walther  
746 [38] provides a rigorous theoretical treatment of the problem. We empirically measure the memory  
747 consumption of different methods for commonly used large language models, but here we hope to  
748 provide a more rigorous comparison of different gradient estimation algorithms, independent of the  
749 software used to implement them. Below, we summarize some key points that may help readers to  
750 understand how the MeZO compute-memory tradeoff compares to backpropagation.

751 Given a network, the first step to perform backpropagation is to decompose the model into easily  
752 differentiable blocks. We note that this decomposition is not unique. For each block, one can  
753 choose to cache the resulting output during the forward pass (thereby consuming memory) or instead  
754 recompute the output when it is needed (thereby consuming compute). The below proposition,  
755 adapted from Rule 21 in Griewank and Walther [38], captures this tradeoff.

756 **Proposition 2** (Time-Memory Tradeoff for Backpropagation, Griewank and Walther [38]). *Consider*  
757 *a network containing  $N$  bits. For any time-memory tradeoff hyperparameter  $c = O(1)$ , there exists a*  
758 *backpropagation algorithm that runs in time  $O(cN)$  and consumes memory proportional to  $O(N^{1/c})$ .*

759 Grimm et al. [39] also gave sharp bounds for the memory-time product. Note that the popular gradient  
760 checkpointing [17] method allows one to tune  $c$  with limited precision (i.e., one cannot always further  
761 split a differentiable block and observe savings). Experiments in Chen et al. [17] choose  $c = 2$   
762 to achieve  $O(\sqrt{N})$  memory while consuming  $O(2N)$  computation. In the extreme case, gradient  
763 checkpointing allows one to use  $O(N \log N)$  computation and  $O(\log N)$  memory.

764 MeZO always consumes  $2N$  compute and  $O(1)$  memory, so it is more compute-efficient at at the  
765 same memory cost as gradient checkpointing. Our exposition in Section 2 discusses that we can  
766 perturb groups of parameters together to save time while consuming additional memory. However,  
767 we do not consider that variant here because it is somewhere in the middle of the compute-memory  
768 pareto curve, where we cannot reason about what backpropagation will do. In particular, MeZO can  
769 split groups differently than backpropagation can, since MeZO does not require that each parameter  
770 group is easily differentiable, so it is hard to compare the two algorithms along the entire pareto  
771 curve.

772 We also compare backpropagation for the  $c = 1$  case (i.e., storing everything during the forward  
773 pass). When storing everything, backpropagation consumes  $O(N)$  time and  $O(N)$  memory. Hence,

SPSA consumes slightly more time and substantially less memory than backpropagation at this end of the tradeoff.

Unlike gradient checkpointing, MeZO computes only an approximation of the gradient. This approximation is only useful for fine-tuning with a prompt, making it less broadly useful than gradient checkpointing. There are other methods that approximate the gradient with less memory consumption than gradient checkpointing (see the Related Work section), though it is unclear how the memory consumption of those algorithms compare to MeZO.

## D Experiment setup

### D.1 Datasets

For RoBERTa-large, we consider classification datasets: SST-2 [82], SST-5 [82], TREC [91], MNLI [97], SNLI [11], and RTE [21, 8, 35, 9]. We follow Malladi et al. [65] in limiting the test set to 1,000 examples for fast iteration. For training and validation, we have two settings:  $k = 16$  and  $k = 512$ , which mean that we have 16 or 512 examples per class for both training and validation.

For OPT experiments, we consider the SuperGLUE dataset collection [92], including: BoolQ [20], CB [23], COPA [78], MultiRC [49], ReCoRD [104], RTE [21, 8, 35, 9], WiC [74], and WSC [53]. We also include SST-2 [82] and two question answering (QA) datasets, SQuAD [77] and DROP [30]. We randomly sample 1,000 examples for training, 500 examples for validation, and 1,000 examples for testing.

### D.2 Prompts

Table 11 shows the set of downstream tasks and prompts with which we fine-tune RoBERTa-large, which are adapted from [33].

| Dataset | $C$ | Type           | Prompt                                                 | Label words                                                |
|---------|-----|----------------|--------------------------------------------------------|------------------------------------------------------------|
| SST-2   | 2   | sentiment cls. | $\langle S_1 \rangle$ It was [MASK] .                  | {great, terrible}                                          |
| SST-5   | 5   | sentiment cls. | $\langle S_1 \rangle$ It was [MASK] .                  | {great, good, okay, bad, terrible}                         |
| TREC    | 6   | topic cls.     | [MASK] : $\langle S_1 \rangle$                         | {Description, Expression, Entity, Human, Location, Number} |
| MNLI    | 3   | NLI            | $\langle S_1 \rangle$ ? [MASK] , $\langle S_2 \rangle$ | {Yes, Maybe, No}                                           |
| SNLI    | 3   | NLI            | $\langle S_1 \rangle$ ? [MASK] , $\langle S_2 \rangle$ | {Yes, Maybe, No}                                           |
| RTE     | 2   | NLI            | $\langle S_1 \rangle$ ? [MASK] , $\langle S_2 \rangle$ | {Yes, No}                                                  |

Table 11: The prompts of the datasets we used in our RoBERTa-large experiments (Table 16 and Figure 2). The prompts are adapted from [33] and include a template and a set of label words that can fill in the [MASK] token.  $\langle S_1 \rangle$  and  $\langle S_2 \rangle$  refer to the first and the second (if any) input sentence.

Table 12 demonstrates the prompts we use for OPT. Note that in OPT experiments we have three types of tasks: classification, multiple-choice, and question answering. Prompts are adopted from GPT-3 [12] and PromptSource with minor changes [5].

### D.3 Hyperparameters

We use the hyperparameters in Table 13 for MeZO experiments on RoBERTa-large (Table 16 and Figure 2). Experiments in Appendix A informed the grid; in particular, the choice of  $\epsilon$  seemed to not significantly impact performance, and using a larger batch size consistently yielded faster optimization. We use the hyperparameters in Table 14 for MeZO experiments on OPT.

Regarding learning rate scheduling and early stopping, we use linear learning scheduling for all fine-tuning with backpropagation experiments and constant learning rate for all MeZO experiments. For RoBERTa experiments, we evaluate the model on validation sets every 1/10 of total training steps and save the best validation checkpoint. All FT experiments use 1K steps and MeZO experiments use 100K steps. For OPT experiments, we evaluate the model on validation sets every 1/5 of the total training steps and save the best validation checkpoint. All FT experiments train for 5 epochs and all

| Dataset | Type | Prompt                                                                                                        |
|---------|------|---------------------------------------------------------------------------------------------------------------|
| SST-2   | cls. | <text> It was terrible/great                                                                                  |
| RTE     | cls. | <premise><br>Does this mean that "<hypothesis>" is true? Yes or No?<br>Yes/No                                 |
| CB      | cls. | Suppose <premise> Can we infer that "<hypothesis>"? Yes, No, or Maybe?<br>Yes/No/Maybe                        |
| BoolQ   | cls. | <passage> <question>?<br>Yes/No                                                                               |
| WSC     | cls. | <text><br>In the previous sentence, does the pronoun "<span2>" refer to <span1>? Yes or No?<br>Yes/No         |
| WIC     | cls. | Does the word "<word>" have the same meaning in these two sentences? Yes, No?<br><sent1><br><sent2><br>Yes/No |
| MultiRC | cls. | <paragraph><br>Question: <question><br>I found this answer "<answer>". Is that correct? Yes or No?<br>Yes/No  |
| COPA    | mch. | <premise> so/because <candidate>                                                                              |
| ReCoRD  | mch. | <passage><br><query>.replace("@placeholder", <candidate>)                                                     |
| SQuAD   | QA   | Title: <title><br>Context: <context><br>Question: <question><br>Answer:                                       |
| DROP    | QA   | Passage: <context><br>Question: <question><br>Answer:                                                         |

Table 12: The prompts of the datasets we used in our OPT experiments. There are three types of tasks: classification (cls.), multiple-choice (mch.), and question answering (QA). Prompts are adopted from GPT-3 [12] and PromptSource [5] with minor changes. <text> represents input from the dataset and Yes represents label words. For inference on multiple choice tasks, we put in different candidates in the prompt and calculate the average log-likelihood for each candidate, and choose the candidate with the highest score. For inference on QA tasks, we use greedy decoding to generate the answer.

MeZO experiments use 20K steps. Note that FT experiments mostly converge within 5 epochs but we observe that MeZO performance can still improve with more training steps.

#### D.4 Modeling and implementation

For RoBERTa experiments, we follow [33] for the prompt-based fine-tuning paradigm for masked language models. Please refer to the original paper for more details.

In OPT experiments, for classification tasks, we train the model similar to [33], i.e., we take the logits corresponding to the label words and apply cross entropy loss on them; for multiple choice tasks and generation tasks (QA), we only keep the correct candidate and use teacher forcing to train on the correct examples. We only keep the loss on tokens in the candidate part and exclude the prompt part.

For OPT inference on classification and multiple-choice tasks, we use the model to get the average log-likelihood (by tokens) of all the candidates/label words, and predict the one with the highest average log-likelihood. For generation tasks, we use greedy decoding to generate the answer.

For in-context learning, we use 32 examples in the context. We also try filling in as many examples as possible in the context but does not improve performance and sometimes lead to unstable results. Thus we keep the 32-example results.

For linear probing of classification tasks, we take the output feature and use scipy package to train a linear classifier. For multiple-choice tasks and generation tasks, we found that this leads to poor results since the output space is the whole vocabulary; instead, we do head-tuning, where the whole

| Experiment    | Hyperparameters                 | Values                             |
|---------------|---------------------------------|------------------------------------|
| MeZO          | Batch size                      | 64                                 |
|               | Learning rate                   | $\{1e-7, 1e-6, 1e-5\}$             |
|               | $\epsilon$                      | $1e-3$                             |
|               | Weight Decay                    | 0                                  |
| MeZO (prefix) | Batch size                      | 64                                 |
|               | Learning rate                   | $\{1e-2, 5e-3, 1e-3\}$             |
|               | $\epsilon$                      | $1e-1$                             |
|               | Weight Decay                    | 0                                  |
|               | # prefix tokens                 | 5                                  |
| MeZO (LoRA)   | Batch size                      | 64                                 |
|               | Learning rate                   | $\{1e-5, 5e-5, 1e-4\}$             |
|               | $\epsilon$                      | $1e-3$                             |
|               | Weight Decay<br>( $r, \alpha$ ) | 0.1<br>(8, 16)                     |
| FT with Adam  | Batch size ( $k = 16$ )         | $\{2, 4, 8\}$                      |
|               | Batch size ( $k = 512$ )        | $\{8, 16, 32\}$                    |
|               | Learning Rates                  | $\{1e-5, 3e-5, 5e-5\}$             |
|               | Weight Decay                    | 0                                  |
| FT with SGD   | Batch size ( $k = 16$ )         | $\{2, 4, 8\}$                      |
|               | Batch size ( $k = 512$ )        | $\{8, 16, 32\}$                    |
|               | Learning Rates                  | $\{1e-4, 5e-4, 1e-3, 5e-3, 1e-2\}$ |
|               | Weight Decay                    | 0                                  |
| FT (prefix)   | Batch size                      | $\{8, 16, 32\}$                    |
|               | Learning Rates                  | $\{1e-2, 3e-2, 5e-2\}$             |
|               | Weight Decay                    | 0                                  |
|               | # prefix tokens                 | 5                                  |
| FT (LoRA)     | Batch size                      | $\{4, 8, 16\}$                     |
|               | Learning Rates                  | $\{1e-4, 3e-4, 5e-4\}$             |
|               | ( $r, \alpha$ )                 | (8, 16)                            |

Table 13: The hyperparameter grids used for RoBERTa-large experiments. MeZO uses a constant learning rate schedule, and FT uses linear scheduling. All FT experiments use 1K steps and MeZO experiments use 100K steps. We check validation performance every 1/10 total training steps.

827 model is fixed except for the LM projection head. We use a batch size of 8 and a learning rate of  
828  $\{1e-4, 5e-4\}$ , and train the head for 5 epochs.

829 For experiments on 30B and 66B OPT models, we largely follow the OPT hyperparameters except  
830 that we do not evaluate the intermediate validation performance and directly use the last checkpoint  
831 for evaluation, due to the high storage cost of intermediate checkpoints of large models.

## 832 D.5 Parameter-efficient fine-tuning

833 Fine-tuning and storing a copy of the large language model for each downstream task is expensive.  
834 Parameter-efficient fine-tuning (PEFT) techniques alleviate this problem: instead of tuning all model  
835 parameters, PEFT only tunes a small number of additional parameters (usually less than 1%) and can  
836 often achieve comparable or better performance [55, 52, 29]. The ZO optimizer is compatible with  
837 PEFT methods, since ZO can operate on any subset of the model parameters. We are interested in the  
838 following two common PEFT methods, designed for transformers [90].

839 **LoRA** [44] adds a tunable low-rank delta to a linear layer during fine-tuning. Suppose a linear layer  
840 performed  $\mathbf{W}\mathbf{x} + \mathbf{b}$  during pre-training with  $\mathbf{W} \in \mathbb{R}^{m \times n}$ . When fine-tuning, LoRA introduces two  
841 smaller matrices  $\mathbf{A} \in \mathbb{R}^{m \times r}$  and  $\mathbf{B} \in \mathbb{R}^{r \times n}$  such that  $r \ll \min(m, n)$ . The linear layer is then  
842 computed as

$$\left(\mathbf{W} + \frac{\alpha}{r}\mathbf{A}\mathbf{B}\right)\mathbf{x} + \mathbf{b} \quad (6)$$

| Experiment    | Hyperparameters | Values                 |
|---------------|-----------------|------------------------|
| MeZO          | Batch size      | 16                     |
|               | Learning rate   | $\{1e-6, 1e-7\}$       |
|               | $\epsilon$      | $1e-3$                 |
| MeZO (prefix) | Batch size      | 16                     |
|               | Learning rate   | $\{1e-2, 1e-3\}$       |
|               | $\epsilon$      | $1e-1$                 |
|               | # prefix tokens | 5                      |
| MeZO (LoRA)   | Batch size      | 16                     |
|               | Learning rate   | $\{1e-4, 5e-5\}$       |
|               | $\epsilon$      | $1e-2$                 |
|               | $(r, \alpha)$   | (8, 16)                |
| FT with Adam  | Batch size      | 8                      |
|               | Learning Rates  | $\{1e-5, 5e-5, 8e-5\}$ |

Table 14: The hyperparameter grids used for OPT experiments. All weight decay is set to 0. FT uses 5 epochs and linear scheduled learning rates and MeZO uses 20K steps and constant learning rates. We check validation performance and save the best checkpoint every 1/5 total training steps.

where  $r$  and  $\alpha$  are hyperparameters.  $A$  and  $B$  are trained on the downstream task while  $W$  is frozen at its pre-trained value. In transformers, this modification to the linear layer is applied to the query and value operations of each attention layer. Empirically,  $r$  can be very small, so the number of trainable parameters during fine-tuning is small. We choose  $r = 8$  and  $\alpha = 16$ .

**Prefix-tuning** [55] adds a prefix of  $m$  tunable representations at each layer and freezes the rest of the model. The representations are added as new keys and values and treated as additional context during the attention operation. We initialize these tunable representations by randomly sampling tokens from the vocabulary and passing them through the LLM to get their keys and values at different attention layers. We found this crucial to make prefix tuning stable with MeZO, and this trick additionally boosts the performance of prefix tuning with backpropagation, as shown in Table 15. We also tried the reparameterization trick in [55], which does not help MeZO training. In our experiments, we find  $m = 5$  to be sufficient to achieve good performance on most tasks.

We also show that MeZO is compatible with parameter-efficient fine-tuning methods, such as prefix tuning and LoRA. Surprisingly, the performance of MeZO does not improve substantially when tuning much fewer parameters, as one might expect from classical analyses (see Section 4). Accordingly, our theoretical analysis in Section 4 suggests that the convergence rate of ZO-SGD does not depend on the parameter dimension during fine-tuning.

| Task Type                  | SST-2<br>— sentiment — | SST-5      | SNLI<br>— natural language inference — | MNLI       | RTE        | TREC<br>— topic — |
|----------------------------|------------------------|------------|----------------------------------------|------------|------------|-------------------|
| FT (prefix, random init)   | 90.7 (1.7)             | 47.2 (2.0) | 70.7 (2.8)                             | 62.6 (3.3) | 63.5 (4.4) | 83.4 (4.7)        |
| FT (prefix, real act init) | 91.9 (1.0)             | 47.7 (1.1) | 77.2 (1.3)                             | 66.5 (2.5) | 66.6 (2.0) | 85.7 (1.3)        |

Table 15: Prefix-tuning ablations. We compare randomly-initialized prefixes and real word activation prefixes. Using real word activations significantly outperforms random initialization.

## D.6 Training with non-differentiable objectives

The experiments maximizing the accuracy of a RoBERTa-large model were all conducted using the same grid as MeZO in Table 13.

For OPT experiments on SQuAD with F1 as objective, we use a batch size of 16. For MeZO, we use a learning rate of  $\{1e-6, 5e-6, 1e-5\}$  and  $\epsilon = 1e-3$ . For MeZO (prefix), we use a learning rate of  $\{1e-1, 5e-2, 1e-2\}$  and  $\epsilon = 1e-1$ .

## 866 D.7 Memory profiling

867 In memory profiling, we use standard implementation with Huggingface’s transformers [98]  
 868 package. We did not turn on any advance memory-saving options, e.g., gradient checkpointing. We  
 869 set the per-device batch size as 1 to test the minimum hardware requirement to run the model with  
 870 specific optimization algorithms. For multi-GPU backpropagation, we use fully sharded data parallel  
 871 (FSDP) [32] provided by PyTorch [73]. For multi-GPU MeZO, we use transformers multi-GPU  
 872 inference of large models. We use Nvidia’s nvidia-smi command to monitor the GPU memory  
 873 usage. We call a run “successful” if there is no out of memory error from GPUs for at least 100 steps.

## 874 E More experiment results

### 875 E.1 RoBERTa-large experiments

876 Table 16 contains the detailed numbers corresponding to Figure 2 and also reports the performance of  
 877 MeZO-Adam.

| Task<br>Type                      | SST-2<br>— sentiment — | SST-5      | SNLI<br>— natural language inference — | MNLI        | RTE          | TREC<br>— topic — |
|-----------------------------------|------------------------|------------|----------------------------------------|-------------|--------------|-------------------|
| Zero-shot                         | 79.0                   | 35.5       | 50.2                                   | 48.8        | 51.4         | 32.0              |
| Gradient-free methods: $k = 16$   |                        |            |                                        |             |              |                   |
| LP                                | 76.0 (2.8)             | 40.3 (1.9) | 66.0 (2.7)                             | 56.5 (2.5)  | 59.4 (5.3)   | 51.3 (5.5)        |
| MeZO                              | 90.5 (1.2)             | 45.5 (2.0) | 68.5 (3.9)                             | 58.7 (2.5)  | 64.0 (3.3)   | 76.9 (2.7)        |
| MeZO (LoRA)                       | 91.4 (0.9)             | 43.0 (1.6) | 69.7 (6.0)                             | 64.0 (2.5)  | 64.9 (3.6)   | 73.1 (6.5)        |
| MeZO (prefix)                     | 90.8 (1.7)             | 45.8 (2.0) | 71.6 (2.5)                             | 63.4 (1.8)  | 65.4 (3.9)   | 80.3 (3.6)        |
| MeZO-Adam                         | 90.4 (1.4)             | 45.4 (1.5) | 74.1 (2.7)                             | 64.3 (0.8)† | 59.2 (11.1)† | 78.3 (1.4)        |
| Gradient-based methods: $k = 16$  |                        |            |                                        |             |              |                   |
| FT                                | 91.9 (1.8)             | 47.5 (1.9) | 77.5 (2.6)                             | 70.0 (2.3)  | 66.4 (7.2)   | 85.0 (2.5)        |
| FT (LoRA)                         | 91.4 (1.7)             | 46.7 (1.1) | 74.9 (4.3)                             | 67.7 (1.4)  | 66.1 (3.5)   | 82.7 (4.1)        |
| FT (prefix)                       | 91.9 (1.0)             | 47.7 (1.1) | 77.2 (1.3)                             | 66.5 (2.5)  | 66.6 (2.0)   | 85.7 (1.3)        |
| Gradient-free methods: $k = 512$  |                        |            |                                        |             |              |                   |
| LP                                | 91.3 (0.5)             | 51.7 (0.5) | 80.9 (1.0)                             | 71.5 (1.1)  | 73.1 (1.5)   | 89.4 (0.5)        |
| MeZO                              | 93.3 (0.7)             | 53.2 (1.4) | 83.0 (1.0)                             | 78.3 (0.5)  | 78.6 (2.0)   | 94.3 (1.3)        |
| MeZO (LoRA)                       | 93.4 (0.4)             | 52.4 (0.8) | 84.0 (0.8)                             | 77.9 (0.6)  | 77.6 (1.3)   | 95.0 (0.7)        |
| MeZO (prefix)                     | 93.3 (0.1)             | 53.6 (0.5) | 84.8 (1.1)                             | 79.8 (1.2)  | 77.2 (0.8)   | 94.4 (0.7)        |
| MeZO-Adam                         | 93.3 (0.6)             | 53.9 (0.8) | 85.3 (0.8)                             | 79.6 (0.4)  | 79.2 (1.2)   | 95.1 (0.3)        |
| Gradient-based methods: $k = 512$ |                        |            |                                        |             |              |                   |
| FT                                | 93.9 (0.7)             | 55.9 (0.9) | 88.7 (0.8)                             | 84.4 (0.8)  | 82.7 (1.4)   | 97.3 (0.2)        |
| FT (LoRA)                         | 94.2 (0.2)             | 55.3 (0.7) | 88.3 (0.5)                             | 83.9 (0.6)  | 83.2 (1.3)   | 97.0 (0.3)        |
| FT (prefix)                       | 93.7 (0.3)             | 54.6 (0.7) | 88.3 (0.7)                             | 83.3 (0.5)  | 82.5 (0.8)   | 97.4 (0.2)        |

Table 16: Experiments on RoBERTa-large (350M parameters). LP: Linear probing; ZO, ZO (LoRA), and ZO (prefix): our memory-efficient ZO-SGD (Section 2.1) with full-parameter tuning, LoRA, and prefix-tuning respectively; FT: fine-tuning with Adam. All reported numbers are averaged accuracy (standard deviation). All experiments use prompts (Appendix D.2). ZO outperforms zero-shot and LP by a large margin and approaches FT performance with much less memory cost.

878 **LP-MeZO** We also compare MeZO to performing linear probing and then subsequently performing  
 879 fine-tuning via MeZO, following the analogous suggestion for fine-tuning in Kumar et al. [51]. We use  
 880 the MeZO grid described in Table 13. Note that the linear probing checkpoints used here have early  
 881 stopping, unlike the ones reported in Table 16. We heuristically implement early stopping by limiting  
 882 the number of iterations (from 5000 to 1000) and increasing the convergence tolerance (from  $1e-4$  to  
 883 0.01) in the scipy solver. Experiments on a few settings show that LP-MeZO can sometimes improve  
 884 performance without increasing the memory consumption (see Table 17). However, sometimes, linear  
 885 probing first can severely hurt performance.



| Task      | SST-2             | SST-5             | SNLI              | TREC              |
|-----------|-------------------|-------------------|-------------------|-------------------|
| Zero-shot | 79.0              | 35.5              | 50.2              | 32.0              |
| FT        | 91.9 (1.8)        | 47.5 (1.9)        | 77.5 (2.6)        | 85.0 (2.5)        |
| MeZO      | 90.5 (1.2)        | <b>45.5 (2.0)</b> | 68.5 (3.9)        | <b>76.9 (2.7)</b> |
| LP-MeZO   | <b>91.4 (1.4)</b> | 41.9 (3.3)        | <b>70.7 (3.4)</b> | 54.0 (4.5)        |

Table 17: Performing linear probing before fine-tuning with MeZO, as suggested previously [51], can sometimes improve performance without increasing the memory overhead. We use  $k = 16$  for these experiments.

## 886 E.2 OPT experiments

887 Table 18 present the full results of OPT-30B and OPT-66B, with detailed MeZO numbers.

| Task              | SST-2 | RTE         | BoolQ | WSC  | WIC  | SQuAD |
|-------------------|-------|-------------|-------|------|------|-------|
| 30B zero-shot     | 56.7  | 52.0        | 39.1  | 38.5 | 50.2 | 46.5  |
| 30B ICL           | 81.9  | 66.8        | 66.2  | 56.7 | 51.3 | 78.0  |
| 30B MeZO          | 90.6  | 66.4        | 67.2  | 63.5 | 56.3 | 85.2  |
| 30B MeZO (prefix) | 87.5  | 72.6        | 73.5  | 55.8 | 59.1 | 83.9  |
| 66B zero-shot     | 57.5  | <b>67.2</b> | 66.8  | 43.3 | 50.6 | 48.1  |
| 66B ICL           | 89.3  | 65.3        | 62.8  | 52.9 | 54.9 | 81.3  |
| 66B MeZO          | 91.2  | 65.7        | 72.7  | 63.5 | 58.9 | *     |
| 66B MeZO (prefix) | 93.6  | 66.4        | 73.7  | 57.7 | 58.6 | 85.0  |

Table 18: Experiments on OPT-30B and OPT-66B (with 1,000 examples). \*: MeZO requires further tuning to successfully optimize.

## 888 E.3 Convergence of MeZO with full-parameter and PEFT

889 We demonstrate the convergence rate of MeZO, MeZO (LoRA) and MeZO (prefix) on SST-2 and  
890 SNLI for the first 5,000 steps in Figures 5. We see that despite the different number of parameters  
891 they optimize, MeZO demonstrates similar training speed on full parameter and PEFT. This agrees  
892 with our theory in Section 4, which shows that MeZO’s optimization speed is independent of the  
893 number of parameters.

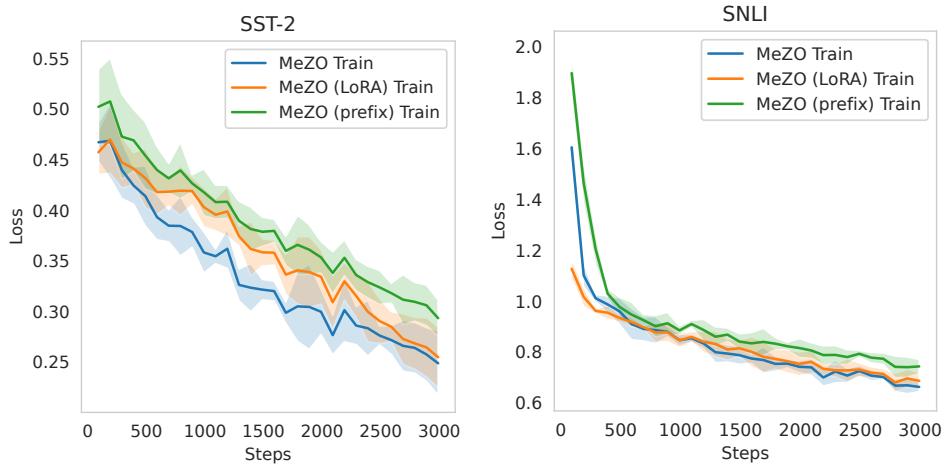

Figure 5: MeZO does not optimize significantly faster when tuning fewer parameters, agreeing with our theory in Section 4.

#### 894 E.4 ZO vs BBTv2

895 We compare ZO with BBTv2 [85] on mutually assessed tasks in Table 19. ZO significantly outperform  
 896 BBTv2. Furthermore, BBTv2 is limited to optimize in low-dimensional space and requires prefix-  
 897 tuning and a down-projection to reduce the number of optimized parameters. BBTv2 also employs  
 898 an iterative scheme which only optimizes one layer at a time. In contrast, ZO works with both  
 899 full-parameter tuning and PEFT, as shown in our experiments (Section 3) and theory (Section 4).

| Task          | <b>SST-2</b>  | <b>SNLI</b>                    | <b>RTE</b> |
|---------------|---------------|--------------------------------|------------|
| Task type     | — sentiment — | – natural language inference – |            |
| Zero-shot     | 79.0          | 50.2                           | 51.4       |
| BBTv2         | 90.3 (1.7)    | 57.3 (2.3)                     | 56.7 (3.3) |
| MeZO          | 90.5 (1.2)    | 68.5 (3.9)                     | 64.0 (3.3) |
| MeZO (LoRA)   | 91.4 (0.9)    | 69.7 (6.0)                     | 64.9 (3.6) |
| MeZO (prefix) | 90.8 (1.7)    | 71.6 (2.5)                     | 65.4 (3.9) |

Table 19: ZO vs BBTv2 with RoBERTa-large. BBTv2 performance is from Sun et al. [85].

#### 900 E.5 Memory profiling

901 We show the detailed numbers of memory profiling results Table 20, which also corresponds to  
 902 Figure 3. For how we profile the memory usage, please refer to Appendix D.7.

| Method | <b>Zero-shot / MeZO</b> | <b>ICL</b>     | <b>Prefix FT</b> | <b>Full-parameter FT</b> |
|--------|-------------------------|----------------|------------------|--------------------------|
| 1.3B   | 1xA100 (4GB)            | 1xA100 (6GB)   | 1xA100 (19GB)    | 1xA100 (27GB)            |
| 2.7B   | 1xA100 (7GB)            | 1xA100 (8GB)   | 1xA100 (29GB)    | 1xA100 (55GB)            |
| 6.7B   | 1xA100 (14GB)           | 1xA100 (16GB)  | 1xA100 (46GB)    | 2xA100 (156GB)           |
| 13B    | 1xA100 (26GB)           | 1xA100 (29GB)  | 2xA100 (158GB)   | 4xA100 (316GB)           |
| 30B    | 1xA100 (58GB)           | 1xA100 (62GB)  | 4xA100 (315GB)   | 8xA100 (633GB)           |
| 66B    | 2xA100 (128GB)          | 2xA100 (134GB) | 8xA100           | 16xA100                  |

Table 20: Memory usage on the MultiRC (avg #tokens=400) dataset.

## 903 F Proofs

904 *Proof of Lemma 2.* We first note that in the  $\epsilon \rightarrow 0$  limit, we have

$$\widehat{\nabla} \mathcal{L}(\boldsymbol{\theta}; \mathcal{B}) = \frac{1}{Bn} \sum_{(\mathbf{x}, \mathbf{y}) \in \mathcal{B}} \sum_{i \in [n]} \mathbf{z}_i \mathbf{z}_i^T \nabla \mathcal{L}(\boldsymbol{\theta}; \{(\mathbf{x}, \mathbf{y})\}).$$

905 Taking expectation over the batch  $\mathcal{B}$  and the  $\mathbf{z}_i$ , we have  $\mathbb{E}[\widehat{\nabla} \mathcal{L}(\boldsymbol{\theta}; \mathcal{B})] = \nabla \mathcal{L}(\boldsymbol{\theta})$ , so  $\widehat{\nabla} \mathcal{L}(\boldsymbol{\theta}; \mathcal{B})$  is an  
906 unbiased estimator of the gradient.

907 Computing the second moment, we get

$$\begin{aligned} & \mathbb{E} \left[ \widehat{\nabla} \mathcal{L}(\boldsymbol{\theta}; \mathcal{B}) \widehat{\nabla} \mathcal{L}(\boldsymbol{\theta}; \mathcal{B})^T \right] \\ &= \frac{1}{B^2 n^2} \sum_{(\mathbf{x}_1, \mathbf{y}_1), (\mathbf{x}_2, \mathbf{y}_2) \in \mathcal{B}} \sum_{i, j \in [n]} \mathbb{E} \left[ (\mathbf{z}_i \mathbf{z}_i^T \nabla \mathcal{L}(\boldsymbol{\theta}; \{(\mathbf{x}_1, \mathbf{y}_1)\})) (\mathbf{z}_j \mathbf{z}_j^T \nabla \mathcal{L}(\boldsymbol{\theta}; \{(\mathbf{x}_2, \mathbf{y}_2)\}))^T \right] \end{aligned}$$

908 Let  $\mathbf{u}, \mathbf{v}$  be two arbitrary vectors. We have that

$$\mathbb{E}_{\mathbf{z}_i, \mathbf{z}_j} [\mathbf{z}_i \mathbf{z}_i^T \mathbf{u} \mathbf{v}^T \mathbf{z}_j \mathbf{z}_j^T] = \mathbf{u} \mathbf{v}^T$$

909 when  $i \neq j$ , and

$$\begin{aligned} \mathbb{E}_{\mathbf{z}_i} [\mathbf{z}_i \mathbf{z}_i^T \mathbf{u} \mathbf{v}^T \mathbf{z}_i \mathbf{z}_i^T] &= \mathbb{E}_{\mathbf{z}} [\mathbf{z} \mathbf{z}^{\otimes 4}] (\mathbf{u}, \mathbf{v}) \\ &= \frac{3d}{d+2} \text{Sym}(\mathbf{I}^{\otimes 2}) (\mathbf{u}, \mathbf{v}) \\ &= \frac{d}{d+2} \cdot \mathbf{u}^T \mathbf{v} \cdot \mathbf{I} + \frac{2d}{d+2} \cdot \mathbf{u} \mathbf{v}^T. \end{aligned}$$

910 Therefore

$$\begin{aligned} & \mathbb{E} \left[ \widehat{\nabla} \mathcal{L}(\boldsymbol{\theta}; \mathcal{B}) \widehat{\nabla} \mathcal{L}(\boldsymbol{\theta}; \mathcal{B})^T \right] \\ &= \frac{1}{B^2} \sum_{(\mathbf{x}_1, \mathbf{y}_1), (\mathbf{x}_2, \mathbf{y}_2) \in \mathcal{B}} \left( \frac{n-1}{n} + \frac{2d}{n(d+2)} \right) \mathbb{E} \left[ \mathcal{L}(\boldsymbol{\theta}; \{(\mathbf{x}_1, \mathbf{y}_1)\}) \mathcal{L}(\boldsymbol{\theta}; \{(\mathbf{x}_2, \mathbf{y}_2)\})^T \right] \\ &\quad + \frac{d}{n(d+2)} \cdot \mathbb{E} \left[ \mathcal{L}(\boldsymbol{\theta}; \{(\mathbf{x}_1, \mathbf{y}_1)\})^T \mathcal{L}(\boldsymbol{\theta}; \{(\mathbf{x}_2, \mathbf{y}_2)\}) \right] \mathbf{I}. \end{aligned}$$

911 Next, note that when  $(\mathbf{x}_1, \mathbf{y}_1) \neq (\mathbf{x}_2, \mathbf{y}_2)$ , we have

$$\mathbb{E} \left[ \mathcal{L}(\boldsymbol{\theta}; \{(\mathbf{x}_1, \mathbf{y}_1)\}) \mathcal{L}(\boldsymbol{\theta}; \{(\mathbf{x}_2, \mathbf{y}_2)\})^T \right] = \nabla \mathcal{L}(\boldsymbol{\theta}) \nabla \mathcal{L}(\boldsymbol{\theta})^T,$$

912 and when  $(\mathbf{x}_1, \mathbf{y}_1) = (\mathbf{x}_2, \mathbf{y}_2)$  we have

$$\mathbb{E} \left[ \mathcal{L}(\boldsymbol{\theta}; \{(\mathbf{x}_1, \mathbf{y}_1)\}) \mathcal{L}(\boldsymbol{\theta}; \{(\mathbf{x}_2, \mathbf{y}_2)\})^T \right] = \nabla \mathcal{L}(\boldsymbol{\theta}) \nabla \mathcal{L}(\boldsymbol{\theta})^T + \boldsymbol{\Sigma}_{MB}(\boldsymbol{\theta}).$$

913 Therefore

$$\frac{1}{B^2} \sum_{(\mathbf{x}_1, \mathbf{y}_1), (\mathbf{x}_2, \mathbf{y}_2) \in \mathcal{B}} \mathbb{E} \left[ \mathcal{L}(\boldsymbol{\theta}; \{(\mathbf{x}_1, \mathbf{y}_1)\}) \mathcal{L}(\boldsymbol{\theta}; \{(\mathbf{x}_2, \mathbf{y}_2)\})^T \right] = \nabla \mathcal{L}(\boldsymbol{\theta}) \nabla \mathcal{L}(\boldsymbol{\theta})^T + \frac{1}{B} \boldsymbol{\Sigma}(\boldsymbol{\theta}),$$

914 and plugging this yields

$$\begin{aligned} \mathbb{E} \left[ \widehat{\nabla} \mathcal{L}(\boldsymbol{\theta}; \mathcal{B}) \widehat{\nabla} \mathcal{L}(\boldsymbol{\theta}; \mathcal{B})^T \right] &= \left( 1 + \frac{d-2}{n(d+2)} \right) \cdot \left( \nabla \mathcal{L}(\boldsymbol{\theta}) \nabla \mathcal{L}(\boldsymbol{\theta})^T + \frac{1}{B} \boldsymbol{\Sigma}(\boldsymbol{\theta}) \right) \\ &\quad + \frac{d}{n(d+2)} \mathbf{I} \cdot \left( \|\nabla \mathcal{L}(\boldsymbol{\theta})\|^2 + \frac{1}{B} \text{tr}(\boldsymbol{\Sigma}(\boldsymbol{\theta})) \right). \end{aligned} \tag{7}$$

915 Finally, we have

$$\begin{aligned} \mathbb{E} \left[ \left\| \widehat{\nabla} \mathcal{L}(\boldsymbol{\theta}; \mathcal{B}) \right\|^2 \right] &= \left( 1 + \frac{d^2 + d - 2}{n(d+2)} \right) \cdot \left( \|\nabla \mathcal{L}(\boldsymbol{\theta})\|^2 + \frac{1}{B} \text{tr}(\boldsymbol{\Sigma}(\boldsymbol{\theta})) \right) \\ &= \frac{d+n-1}{n} \cdot \mathbb{E} \left[ \|\nabla \mathcal{L}(\boldsymbol{\theta}; \mathcal{B})\|^2 \right]. \end{aligned}$$

916

□

917 *Proof of Theorem 1.* By Taylor's theorem with remainder, we have that

$$\begin{aligned}\mathcal{L}(\boldsymbol{\theta}_{t+1}) &= \mathcal{L}(\boldsymbol{\theta}_t) + \nabla \mathcal{L}(\boldsymbol{\theta}_t)^T (\boldsymbol{\theta}_{t+1} - \boldsymbol{\theta}_t) \\ &\quad + \int_0^1 \lambda (\boldsymbol{\theta}_{t+1} - \boldsymbol{\theta}_t)^T \nabla^2 \mathcal{L}(\lambda \boldsymbol{\theta}_{t+1} + (1-\lambda)\boldsymbol{\theta}_t) (\boldsymbol{\theta}_{t+1} - \boldsymbol{\theta}_t)^T d\lambda\end{aligned}$$

918 Next, note that

$$\|\boldsymbol{\theta}_{t+1} - \boldsymbol{\theta}_t\| = \eta \left\| \widehat{\nabla} \mathcal{L}(\boldsymbol{\theta}; \mathcal{B}) \right\| \leq \eta \sqrt{d} \cdot \frac{1}{Bn} \sum |z_i^T \nabla \mathcal{L}(\boldsymbol{\theta}; \{(x, y)\})| \leq \eta d G(\boldsymbol{\theta}_t).$$

919 Therefore  $\|\lambda \boldsymbol{\theta}_{t+1} + (1-\lambda)\boldsymbol{\theta}_t - \boldsymbol{\theta}_t\| \leq \eta d G(\boldsymbol{\theta}_t)$ . By the assumption we have the upper bound  
920  $\nabla^2 \mathcal{L}(\lambda \boldsymbol{\theta}_{t+1} + (1-\lambda)\boldsymbol{\theta}_t) \preceq \mathbf{H}(\boldsymbol{\theta}_t)$ , and thus

$$\begin{aligned}\mathcal{L}(\boldsymbol{\theta}_{t+1}) &\leq \mathcal{L}(\boldsymbol{\theta}_t) + \nabla \mathcal{L}(\boldsymbol{\theta}_t)^T (\boldsymbol{\theta}_{t+1} - \boldsymbol{\theta}_t) + (\boldsymbol{\theta}_{t+1} - \boldsymbol{\theta}_t)^T \mathbf{H}(\boldsymbol{\theta}_t) (\boldsymbol{\theta}_{t+1} - \boldsymbol{\theta}_t) \\ &= \mathcal{L}(\boldsymbol{\theta}_t) - \eta \nabla \mathcal{L}(\boldsymbol{\theta}_t)^T \widehat{\nabla} \mathcal{L}(\boldsymbol{\theta}_t; \mathcal{B}) + \frac{1}{2} \eta^2 \widehat{\nabla} \mathcal{L}(\boldsymbol{\theta}_t; \mathcal{B})^T \mathbf{H}(\boldsymbol{\theta}_t) \widehat{\nabla} \mathcal{L}(\boldsymbol{\theta}_t; \mathcal{B}).\end{aligned}$$

921 Taking the conditional expectation with respect to  $\boldsymbol{\theta}_t$  and plugging in (9), the formula for the  
922 covariance of our ZO estimate  $\widehat{\nabla} \mathcal{L}(\boldsymbol{\theta}_t; \mathcal{B})$ , yields

$$\begin{aligned}\mathbb{E}[\mathcal{L}(\boldsymbol{\theta}_{t+1}) \mid \boldsymbol{\theta}_t] &\leq \mathcal{L}(\boldsymbol{\theta}_t) - \eta \|\nabla \mathcal{L}(\boldsymbol{\theta}_t)\|^2 + \frac{\eta^2}{2} \left\langle \mathbf{H}(\boldsymbol{\theta}_t), \mathbb{E} \left[ \widehat{\nabla} \mathcal{L}(\boldsymbol{\theta}; \mathcal{B}) \widehat{\nabla} \mathcal{L}(\boldsymbol{\theta}; \mathcal{B})^T \right] \right\rangle \\ &= \mathcal{L}(\boldsymbol{\theta}_t) - \eta \|\nabla \mathcal{L}(\boldsymbol{\theta}_t)\|^2 + \frac{\eta^2}{2} \cdot \frac{d}{n(d+2)} \left( \|\nabla \mathcal{L}(\boldsymbol{\theta}_t)\|^2 + \frac{1}{B} \text{tr}(\boldsymbol{\Sigma}(\boldsymbol{\theta}_t)) \right) \text{tr}(\mathbf{H}(\boldsymbol{\theta}_t)) \\ &\quad + \frac{\eta^2}{2} \left( 1 + \frac{d-2}{n(d+2)} \right) \left( \nabla \mathcal{L}(\boldsymbol{\theta}_t)^T \mathbf{H}(\boldsymbol{\theta}_t) \nabla \mathcal{L}(\boldsymbol{\theta}_t) + \frac{1}{B} \langle \boldsymbol{\Sigma}(\boldsymbol{\theta}_t), \mathbf{H}(\boldsymbol{\theta}_t) \rangle \right)\end{aligned}$$

923 By assumption, the Hessian upper bound  $\mathbf{H}(\boldsymbol{\theta}_t)$  satisfies  $\|\mathbf{H}(\boldsymbol{\theta}_t)\|_{op} \leq \ell$  and  $\text{tr}(\mathbf{H}(\boldsymbol{\theta}_t)) \leq \ell r$ . Thus

$$\begin{aligned}\mathbb{E}[\mathcal{L}(\boldsymbol{\theta}_{t+1}) \mid \boldsymbol{\theta}_t] &\leq \mathcal{L}(\boldsymbol{\theta}_t) - \eta \|\nabla \mathcal{L}(\boldsymbol{\theta}_t)\|^2 + \frac{\eta^2 \ell}{2} \cdot \left( \frac{dr + d - 2}{n(d+2)} + 1 \right) \cdot \left( \|\nabla \mathcal{L}(\boldsymbol{\theta}_t)\|^2 + \frac{1}{B} \text{tr}(\boldsymbol{\Sigma}(\boldsymbol{\theta}_t)) \right) \\ &= \mathcal{L}(\boldsymbol{\theta}_t) - \eta \|\nabla \mathcal{L}(\boldsymbol{\theta}_t)\|^2 + \frac{\eta^2 \ell}{2} \cdot \left( \frac{dr + d - 2}{n(d+2)} + 1 \right) \cdot \mathbb{E} \left[ \|\nabla \mathcal{L}(\boldsymbol{\theta}_t; \mathcal{B})\|^2 \right],\end{aligned}$$

924 as desired.  $\square$

## 925 F.1 Proofs of Global Convergence

926 **Lemma 4.** Let  $\mathcal{L}(\boldsymbol{\theta})$  be  $\mu$ -PL and let there exist  $\alpha$  such that  $\text{tr}(\boldsymbol{\Sigma}(\boldsymbol{\theta})) \leq \alpha(\mathcal{L}(\boldsymbol{\theta}) - \mathcal{L}^*)$  for all  $\boldsymbol{\theta}$ .  
927 Then after

$$t = O \left( \left( \frac{\ell}{\mu} + \frac{\ell \alpha}{\mu^2 B} \right) \log \frac{\mathcal{L}(\boldsymbol{\theta}_0) - \mathcal{L}^*}{\epsilon} \right)$$

928 iterations of SGD we have  $\mathbb{E}[\mathcal{L}(\boldsymbol{\theta}_t)] \leq \mathcal{L}^* + \epsilon$ .

929 *Proof of Lemma 4.* The descent lemma for SGD yields

$$\mathbb{E}[\mathcal{L}(\boldsymbol{\theta}_{t+1}) \mid \boldsymbol{\theta}_t] - \mathcal{L}(\boldsymbol{\theta}_t) \leq -\eta \|\nabla \mathcal{L}(\boldsymbol{\theta}_t)\|^2 + \frac{1}{2} \eta^2 \ell \cdot \mathbb{E}[\|\nabla \mathcal{L}(\boldsymbol{\theta}_t; \mathcal{B})\|^2].$$

930 Plugging in  $\mathbb{E}[\|\nabla \mathcal{L}(\boldsymbol{\theta}_t; \mathcal{B})\|^2] = \|\nabla \mathcal{L}(\boldsymbol{\theta}_t)\|^2 + \frac{1}{B} \text{tr}(\boldsymbol{\Sigma}(\boldsymbol{\theta}_t))$  and selecting a learning rate  $\eta \leq \frac{1}{\ell}$   
931 yields

$$\mathbb{E}[\mathcal{L}(\boldsymbol{\theta}_{t+1}) \mid \boldsymbol{\theta}_t] \leq \mathcal{L}(\boldsymbol{\theta}_t) - \frac{\eta}{2} \|\nabla \mathcal{L}(\boldsymbol{\theta}_t)\|^2 + \frac{\eta^2 \ell}{2B} \text{tr}(\boldsymbol{\Sigma}(\boldsymbol{\theta}_t))$$

932 Since  $\mathcal{L}$  is  $\mu$ -PL, we get

$$\mathbb{E}[\mathcal{L}(\boldsymbol{\theta}_{t+1}) \mid \boldsymbol{\theta}_t] \leq \mathcal{L}(\boldsymbol{\theta}_t) - \eta \mu (\mathcal{L}(\boldsymbol{\theta}_t) - \mathcal{L}^*) + \frac{\eta^2 \ell}{2B} \text{tr}(\boldsymbol{\Sigma}(\boldsymbol{\theta}_t)).$$

933 Since  $\text{tr}(\Sigma(\theta_t)) \leq \alpha(\mathcal{L}(\theta_t) - \mathcal{L}^*)$ , we have

$$\mathbb{E}[\mathcal{L}(\theta_{t+1}) \mid \theta_t] \leq \mathcal{L}(\theta_t) - \eta\mu(\mathcal{L}(\theta_t) - \mathcal{L}^*) + \frac{\eta^2\ell\alpha}{2B}(\mathcal{L}(\theta_t) - \mathcal{L}^*).$$

934 Altogether,

$$\mathbb{E}[\mathcal{L}(\theta_{t+1})] - \mathcal{L}^* \leq \left(1 - \eta\mu + \frac{\eta^2\ell\alpha}{2B}\right) (\mathbb{E}[\mathcal{L}(\theta_t)] - \mathcal{L}^*)$$

935 Choosing  $\eta = \min(\frac{1}{\ell}, \frac{\mu B}{\ell\alpha})$ , we obtain

$$\mathbb{E}[\mathcal{L}(\theta_{t+1})] - \mathcal{L}^* \leq \left(1 - \min(\frac{\mu}{2\ell}, \frac{\mu^2 B}{2\ell\alpha})\right) (\mathbb{E}[\mathcal{L}(\theta_t)] - \mathcal{L}^*).$$

936 Therefore we reach a solution with  $\mathbb{E}[\mathcal{L}(\theta_t)] - \mathcal{L}^* \leq \epsilon$  after

$$t = \max\left(\frac{2\ell}{\mu}, \frac{2\ell\alpha}{\mu^2 B}\right) \log\left(\frac{\mathcal{L}(\theta_0) - \mathcal{L}^*}{\epsilon}\right) = O\left(\left(\frac{\ell}{\mu} + \frac{\ell\alpha}{\mu^2 B}\right) \log\frac{\mathcal{L}(\theta_0) - \mathcal{L}^*}{\epsilon}\right)$$

937 iterations. □

938 *Proof of Lemma 3.* By Corollary 1, ZO-SGD with  $\eta_{\text{ZO}} = \gamma^{-1}\eta_{\text{SGD}}$  yields

$$\mathbb{E}[\mathcal{L}(\theta_{t+1}) \mid \theta_t] - \mathcal{L}(\theta_t) \leq \frac{1}{\gamma} \cdot \left[-\eta_{\text{SGD}} \|\nabla \mathcal{L}(\theta_t)\|^2 + \frac{1}{2}\eta_{\text{SGD}}^2 \ell \cdot \mathbb{E}[\|\nabla \mathcal{L}(\theta; \mathcal{B})\|^2]\right].$$

939 As in the proof for SGD, choosing  $\eta_{\text{SGD}} \leq \frac{1}{\ell}$  yields

$$\mathbb{E}[\mathcal{L}(\theta_{t+1}) \mid \theta_t] - \mathcal{L}(\theta_t) \leq \gamma^{-1} \cdot \left[-\frac{\eta_{\text{SGD}}}{2} \|\nabla \mathcal{L}(\theta_t)\|^2 + \frac{\eta_{\text{SGD}}^2 \ell}{2B} \text{tr}(\Sigma(\theta_t))\right].$$

940 Therefore under  $\mu$ -PL and the  $\text{tr}(\Sigma(\theta_t)) \leq \alpha(\mathcal{L}(\theta_t) - \mathcal{L}^*)$  assumption we obtain

$$\begin{aligned} \mathbb{E}[\mathcal{L}(\theta_{t+1})] - \mathbb{E}[\mathcal{L}(\theta_t)] &\leq \gamma^{-1} \cdot \left[-\eta_{\text{SGD}}\mu + \frac{\eta_{\text{SGD}}^2 \ell \alpha}{2B}\right] \cdot (\mathbb{E}[\mathcal{L}(\theta_t)] - \mathcal{L}^*) \\ \implies \mathbb{E}[\mathcal{L}(\theta_{t+1})] - \mathcal{L}^* &\leq \left(1 - \gamma^{-1} \left(\eta_{\text{SGD}}\mu - \frac{\eta_{\text{SGD}}^2 \ell \alpha}{2B}\right)\right) (\mathbb{E}[\mathcal{L}(\theta_t)] - \mathcal{L}^*). \end{aligned}$$

941 Choosing  $\eta_{\text{SGD}} = \min(\frac{1}{\ell}, \frac{\mu B}{\ell\alpha})$  yields

$$\mathbb{E}[\mathcal{L}(\theta_{t+1})] - \mathcal{L}^* \leq \left(1 - \gamma^{-1} \cdot \min(\frac{\mu}{2\ell}, \frac{\mu^2 B}{2\ell\alpha})\right) (\mathbb{E}[\mathcal{L}(\theta_t)] - \mathcal{L}^*).$$

942 Therefore we reach a solution with  $\mathbb{E}[\mathcal{L}(\theta_t)] - \mathcal{L}^* \leq \epsilon$  after

$$t = \gamma \cdot \max\left(\frac{2\ell}{\mu}, \frac{2\ell\alpha}{\mu^2 B}\right) \log\left(\frac{\mathcal{L}(\theta_0) - \mathcal{L}^*}{\epsilon}\right) = O\left(\left(\frac{r}{n} + 1\right) \cdot \left(\frac{\ell}{\mu} + \frac{\ell\alpha}{\mu^2 B}\right) \log\frac{\mathcal{L}(\theta_0) - \mathcal{L}^*}{\epsilon}\right)$$

943 iterations. □

#### 944 **F.1.1 Verification of assumptions**

945 We show that the  $\text{tr}(\Sigma(\theta_t)) \leq \alpha(\mathcal{L}(\theta_t) - \mathcal{L}^*)$  assumption holds for certain losses.

946 First, consider optimizing the model  $f(\mathbf{x}; \theta)$  with square loss, so that

$$\mathcal{L}(\theta) = \frac{1}{N} \sum_{i \in [N]} (f(\mathbf{x}_i; \theta) - \mathbf{y}_i)^2.$$

947 One then has that

$$\Sigma(\theta) = \frac{2}{N} \sum_{i \in [N]} (f(\mathbf{x}_i; \theta) - \mathbf{y}_i)^2 \nabla f(\mathbf{x}_i; \theta) \nabla f(\mathbf{x}_i; \theta)^T - \nabla \mathcal{L}(\theta) \nabla \mathcal{L}(\theta)^T.$$

948 Therefore

$$\begin{aligned}\text{tr}(\Sigma(\theta)) &\leq \frac{2}{N} \sum_{i \in [N]} (f(\mathbf{x}_i; \theta) - y_i)^2 \|\nabla f(\mathbf{x}_i; \theta)\|^2 \\ &\leq 2\mathcal{L}(\theta) \sum_{i \in [N]} \|\nabla f(\mathbf{x}_i; \theta)\|^2.\end{aligned}$$

949 Assume that the data can be interpolated, i.e.  $\mathcal{L}^* = 0$ . If the function is  $L$ -Lipschitz, i.e.  $\|\nabla f(\mathbf{x}; \theta)\| \leq$   
 950  $L$ , then the condition holds with  $\alpha = 2NL^2$ . If we are in the kernel regime, i.e.  $f(\mathbf{x}_i; \theta) = \phi(\mathbf{x}_i)^T \theta$   
 951 for some feature map  $\phi$ , then

$$\nabla^2 \mathcal{L}(\theta) = \frac{2}{N} \sum_{i \in [N]} f(\mathbf{x}_i; \theta) \nabla f(\mathbf{x}_i; \theta)^T.$$

952 Thus

$$\text{tr}(\Sigma(\theta)) \leq N \text{tr}(\nabla^2 \mathcal{L}(\theta)) \cdot \mathcal{L}(\theta) \leq N\ell r \cdot \mathcal{L}(\theta).$$

953 So the condition holds for  $\alpha = N\ell r$ .

954 Next, consider the cross entropy loss function, i.e.

$$\mathcal{L}(\theta) = \frac{1}{N} \sum_{i \in [N]} \exp(-y_i f(\mathbf{x}_i; \theta)).$$

955 One then has that

$$\Sigma(\theta) = \frac{1}{N} \sum_{i \in [N]} \exp(-2y_i f(\mathbf{x}_i; \theta)) y_i^2 \nabla f(\mathbf{x}_i; \theta) \nabla f(\mathbf{x}_i; \theta)^T - \mathcal{L}(\theta) \mathcal{L}(\theta)^T,$$

956 Assume that the targets  $y_i$  are bounded in  $[-1, 1]$  (which is true for binary classification tasks), and  
 957 that  $\mathcal{L}^* = 0$  (which can be achieved if  $|f(\mathbf{x}; \theta)|$  can be sent to  $\infty$ ) we have that

$$\text{tr}(\Sigma(\theta)) \leq \frac{1}{N} \sum_{i \in [N]} \exp(-2y_i f(\mathbf{x}_i; \theta)) \|\nabla f(\mathbf{x}_i; \theta)\|^2.$$

958 In the kernel regime,  $f(\mathbf{x}_i; \theta) = \phi(\mathbf{x}_i)^T \theta$ , and thus

$$\nabla^2 \mathcal{L}(\theta) = \frac{1}{N} \sum_{i \in [N]} \exp(-y_i f(\mathbf{x}_i; \theta)) \nabla f(\mathbf{x}_i; \theta) \nabla f(\mathbf{x}_i; \theta)^T.$$

959 Therefore

$$\text{tr}(\Sigma(\theta)) \leq N \text{tr}(\nabla^2 \mathcal{L}(\theta)) \cdot \mathcal{L}(\theta) \leq N\ell r \cdot \mathcal{L}(\theta).$$

960 Therefore the condition holds with  $\alpha = N\ell r$  as well.

## 961 F.2 Proofs for Gaussian perturbations

962 The first lemma computes the second moment of the covariance estimate  $\widehat{\nabla} \mathcal{L}(\theta; \mathcal{B})$  when  $\mathbf{z}$  is drawn  
 963  $\mathcal{N}(0, \mathbf{I})$ .

964 **Lemma 5.** *Let  $\mathbf{z}_i \sim \mathcal{N}(0, \mathbf{I})$  i.i.d. Then*

$$\begin{aligned}\mathbb{E} \left[ \widehat{\nabla} \mathcal{L}(\theta; \mathcal{B}) \widehat{\nabla} \mathcal{L}(\theta; \mathcal{B})^T \right] &= \left( 1 + \frac{1}{n} \right) \cdot \left( \nabla \mathcal{L}(\theta) \nabla \mathcal{L}(\theta)^T + \frac{1}{B} \Sigma_{MB}(\theta) \right) \\ &\quad + \frac{1}{n} \mathbf{I} \cdot \left( \|\nabla \mathcal{L}(\theta)\|^2 + \frac{1}{B} \text{tr}(\Sigma_{MB}(\theta)) \right).\end{aligned}\tag{8}$$

965 *Proof.* As in the proof of Lemma 2, we have that in the  $\epsilon \rightarrow 0$  limit

$$\begin{aligned}\mathbb{E} \left[ \widehat{\nabla} \mathcal{L}(\theta; \mathcal{B}) \widehat{\nabla} \mathcal{L}(\theta; \mathcal{B})^T \right] \\ = \frac{1}{B^2 n^2} \sum_{(\mathbf{x}_1, \mathbf{y}_1), (\mathbf{x}_2, \mathbf{y}_2) \in \mathcal{B}} \sum_{i, j \in [n]} \mathbb{E} \left[ (z_i z_i^T \nabla \mathcal{L}(\theta; \{(\mathbf{x}_1, \mathbf{y}_1)\})) (z_j z_j^T \nabla \mathcal{L}(\theta; \{(\mathbf{x}_2, \mathbf{y}_2)\}))^T \right]\end{aligned}$$



966 For vectors  $\mathbf{u}, \mathbf{v}$ , we have that

$$\mathbb{E}_{\mathbf{z}_i, \mathbf{z}_j} [\mathbf{z}_i \mathbf{z}_i^T \mathbf{u} \mathbf{v}^T \mathbf{z}_j \mathbf{z}_j^T] = \mathbf{u} \mathbf{v}^T$$

967 when  $i \neq j$ , and

$$\mathbb{E}_{\mathbf{z}_i} [\mathbf{z}_i \mathbf{z}_i^T \mathbf{u} \mathbf{v}^T \mathbf{z}_i \mathbf{z}_i^T] = \mathbb{E}_{\mathbf{z}} [\mathbf{z}^{\otimes 4}] (\mathbf{u}, \mathbf{v}) = 3\text{Sym}(\mathbf{I}^{\otimes 2}) (\mathbf{u}, \mathbf{v}) = \mathbf{u}^T \mathbf{v} \cdot \mathbf{I} + 2\mathbf{u} \mathbf{v}^T.$$

968 Therefore

$$\begin{aligned} & \mathbb{E} \left[ \widehat{\nabla} \mathcal{L}(\boldsymbol{\theta}; \mathcal{B}) \widehat{\nabla} \mathcal{L}(\boldsymbol{\theta}; \mathcal{B})^T \right] \\ &= \frac{1}{B^2} \sum_{(\mathbf{x}_1, \mathbf{y}_1), (\mathbf{x}_2, \mathbf{y}_2) \in \mathcal{B}} \left( \frac{n-1}{n} + \frac{2}{n} \right) \mathbb{E} [\mathcal{L}(\boldsymbol{\theta}; \{(\mathbf{x}_1, \mathbf{y}_1)\}) \mathcal{L}(\boldsymbol{\theta}; \{(\mathbf{x}_2, \mathbf{y}_2)\})^T] \\ & \quad + \frac{1}{n} \cdot \mathbb{E} [\mathcal{L}(\boldsymbol{\theta}; \{(\mathbf{x}_1, \mathbf{y}_1)\})^T \mathcal{L}(\boldsymbol{\theta}; \{(\mathbf{x}_2, \mathbf{y}_2)\})] \mathbf{I}. \end{aligned}$$

969 In the proof of Lemma 2 we showed that

$$\frac{1}{B^2} \sum_{(\mathbf{x}_1, \mathbf{y}_1), (\mathbf{x}_2, \mathbf{y}_2) \in \mathcal{B}} \mathbb{E} [\mathcal{L}(\boldsymbol{\theta}; \{(\mathbf{x}_1, \mathbf{y}_1)\}) \mathcal{L}(\boldsymbol{\theta}; \{(\mathbf{x}_2, \mathbf{y}_2)\})^T] = \nabla \mathcal{L}(\boldsymbol{\theta}) \nabla \mathcal{L}(\boldsymbol{\theta})^T + \frac{1}{B} \boldsymbol{\Sigma}(\boldsymbol{\theta}).$$

970 Plugging this yields

$$\begin{aligned} \mathbb{E} \left[ \widehat{\nabla} \mathcal{L}(\boldsymbol{\theta}; \mathcal{B}) \widehat{\nabla} \mathcal{L}(\boldsymbol{\theta}; \mathcal{B})^T \right] &= \left( \frac{n+1}{n} \right) \cdot \left( \nabla \mathcal{L}(\boldsymbol{\theta}) \nabla \mathcal{L}(\boldsymbol{\theta})^T + \frac{1}{B} \boldsymbol{\Sigma}(\boldsymbol{\theta}) \right) \\ & \quad + \frac{1}{n} \mathbf{I} \cdot \left( \|\nabla \mathcal{L}(\boldsymbol{\theta})\|^2 + \frac{1}{B} \text{tr}(\boldsymbol{\Sigma}(\boldsymbol{\theta})) \right). \end{aligned} \tag{9}$$

971

□

972 We can prove an analog to Theorem 1 in the case where the  $\mathbf{z}_i$  are Gaussian. One challenge is that  
 973  $\|\boldsymbol{\theta}_{t+1} - \boldsymbol{\theta}_t\|$  is no longer bounded; instead we the  $r$ -local effective rank assumption only holds with  
 974 high probability, and thus to bound the expected loss decrease we must control the probability of the  
 975  $\|\boldsymbol{\theta}_{t+1} - \boldsymbol{\theta}_t\|$  being large.

976 Consider the following modified version of the local  $r$ -effective rank assumption, where the upper  
 977 bound on the Hessian is measured over a ball of radius twice as large as the one in Assumption 1.

978 **Assumption 2** (Local  $r$ -effective rank, Gaussian). Let  $G(\boldsymbol{\theta}_t) = \max_{(\mathbf{x}, \mathbf{y}) \in \mathcal{D}} \|\nabla \mathcal{L}(\boldsymbol{\theta}_t; \{(\mathbf{x}, \mathbf{y})\})\|$ .  
 979 There exists a matrix  $\mathbf{H}(\boldsymbol{\theta}_t)$  such that:

- 980 1. For all  $\boldsymbol{\theta}$  such that  $\|\boldsymbol{\theta} - \boldsymbol{\theta}_t\| \leq 2\eta d G(\boldsymbol{\theta}_t)$ , we have  $\nabla^2 \mathcal{L}(\boldsymbol{\theta}) \preceq \mathbf{H}(\boldsymbol{\theta}_t)$ .
- 981 2. The effective rank of  $\mathbf{H}(\boldsymbol{\theta}_t)$ , i.e  $\text{tr}(\mathbf{H}(\boldsymbol{\theta}_t)) / \|\mathbf{H}(\boldsymbol{\theta}_t)\|_{\text{op}}$ , is at most  $r$ .

982 **Theorem 2** (Dimension-Free Rate, Gaussian  $\mathbf{z}$ ). Assume the loss exhibits local  $r$ -effective rank  
 983 (Assumption 2). If  $\boldsymbol{\theta}_{t+1} = \boldsymbol{\theta}_t - \eta_{\text{ZO}} \widehat{\nabla} \mathcal{L}(\boldsymbol{\theta}_t; \mathcal{B})$  is a single step of ZO-SGD using the  $n$ -SPSA estimate  
 984 with a minibatch of size  $B$ , then there exists a  $\gamma = \Theta(r/n)$  such that the expected loss decrease can  
 985 be bounded as

$$\begin{aligned} & \mathbb{E}[\mathcal{L}(\boldsymbol{\theta}_{t+1}) \mid \boldsymbol{\theta}_t] - \mathcal{L}(\boldsymbol{\theta}_t) \\ & \leq -\eta_{\text{ZO}} \|\nabla \mathcal{L}(\boldsymbol{\theta}_t)\|^2 + \frac{1}{2} \eta_{\text{ZO}}^2 \ell \cdot \gamma \cdot \mathbb{E}[\|\nabla \mathcal{L}(\boldsymbol{\theta}_t; \mathcal{B})\|^2] + \eta_{\text{ZO}}^2 \ell G(\boldsymbol{\theta}_t)^2 \exp(-\Omega(nd)). \end{aligned}$$

986 *Proof of Theorem 2.* Let  $\mathcal{A}$  be the event that  $\|\boldsymbol{\theta}_{t+1} - \boldsymbol{\theta}_t\| \leq 2\eta d G(\boldsymbol{\theta}_t)$ . On  $\mathcal{A}$ , we have that

$$\mathcal{L}(\boldsymbol{\theta}_{t+1}) \leq \mathcal{L}(\boldsymbol{\theta}_t) - \eta \nabla \mathcal{L}(\boldsymbol{\theta}_t)^T \widehat{\nabla} \mathcal{L}(\boldsymbol{\theta}_t; \mathcal{B}) + \frac{1}{2} \eta^2 \widehat{\nabla} \mathcal{L}(\boldsymbol{\theta}_t; \mathcal{B})^T \mathbf{H}(\boldsymbol{\theta}_t) \widehat{\nabla} \mathcal{L}(\boldsymbol{\theta}_t; \mathcal{B}).$$

987 Likewise, since  $\mathcal{L}$  is  $\ell$ -smooth, we have that

$$\mathcal{L}(\boldsymbol{\theta}_{t+1}) \leq \mathcal{L}(\boldsymbol{\theta}_t) - \eta \nabla \mathcal{L}(\boldsymbol{\theta}_t)^T \widehat{\nabla} \mathcal{L}(\boldsymbol{\theta}_t; \mathcal{B}) + \frac{1}{2} \eta^2 \ell \left\| \widehat{\nabla} \mathcal{L}(\boldsymbol{\theta}_t; \mathcal{B}) \right\|^2.$$

988 Therefore

$$\begin{aligned}
\mathbb{E}[\mathcal{L}(\boldsymbol{\theta}_{t+1}) \mid \boldsymbol{\theta}_t] &\leq \mathcal{L}(\boldsymbol{\theta}_{t+1}) - \eta \|\nabla \mathcal{L}(\boldsymbol{\theta}_t)\|^2 + \frac{1}{2}\eta^2 \left\langle \mathbb{E} \left[ \widehat{\nabla} \mathcal{L}(\boldsymbol{\theta}; \mathcal{B}) \widehat{\nabla} \mathcal{L}(\boldsymbol{\theta}; \mathcal{B})^T \cdot \mathbf{1}(\mathcal{A}) \right], \mathbf{H}(\boldsymbol{\theta}_t) \right\rangle \\
&\quad + \frac{1}{2}\eta^2 \ell \mathbb{E} \left[ \left\| \widehat{\nabla} \mathcal{L}(\boldsymbol{\theta}_t; \mathcal{B}) \right\|^2 \cdot \mathbf{1}(\neg \mathcal{A}) \right] \\
&= \mathcal{L}(\boldsymbol{\theta}_{t+1}) - \eta \|\nabla \mathcal{L}(\boldsymbol{\theta}_t)\|^2 + \frac{1}{2}\eta^2 \left\langle \mathbb{E} \left[ \widehat{\nabla} \mathcal{L}(\boldsymbol{\theta}; \mathcal{B}) \widehat{\nabla} \mathcal{L}(\boldsymbol{\theta}; \mathcal{B})^T \right], \mathbf{H}(\boldsymbol{\theta}_t) \right\rangle \\
&\quad + \frac{1}{2}\eta^2 \left\langle \mathbb{E} \left[ \widehat{\nabla} \mathcal{L}(\boldsymbol{\theta}; \mathcal{B}) \widehat{\nabla} \mathcal{L}(\boldsymbol{\theta}; \mathcal{B})^T \cdot \mathbf{1}(\neg \mathcal{A}) \right], \ell I - \mathbf{H}(\boldsymbol{\theta}_t) \right\rangle.
\end{aligned}$$

989 The latter term can be bounded as follows

$$\begin{aligned}
\frac{1}{2}\eta^2 \left\langle \mathbb{E} \left[ \widehat{\nabla} \mathcal{L}(\boldsymbol{\theta}; \mathcal{B}) \widehat{\nabla} \mathcal{L}(\boldsymbol{\theta}; \mathcal{B})^T \cdot \mathbf{1}(\neg \mathcal{A}) \right], \ell I - \mathbf{H}(\boldsymbol{\theta}_t) \right\rangle &\leq \eta^2 \ell \mathbb{E} \left[ \left\| \widehat{\nabla} \mathcal{L}(\boldsymbol{\theta}; \mathcal{B}) \right\|^2 \cdot \mathbf{1}(\neg \mathcal{A}) \right] \\
&\leq \eta^2 \ell \mathbb{E} \left[ \left\| \widehat{\nabla} \mathcal{L}(\boldsymbol{\theta}; \mathcal{B}) \right\|^4 \right]^{\frac{1}{2}} \Pr[\neg \mathcal{A}]^{1/2}.
\end{aligned}$$

990 The gradient estimate  $\widehat{\nabla} \mathcal{L}(\boldsymbol{\theta}; \mathcal{B})$  satisfies

$$\left\| \widehat{\nabla} \mathcal{L}(\boldsymbol{\theta}; \mathcal{B}) \right\| \leq \frac{1}{n} \sum_{i \in [n]} |\mathbf{z}_i^T \nabla \mathcal{L}(\boldsymbol{\theta}; \mathcal{B})| \cdot \|\mathbf{z}_i\|$$

991 The expectation term is upper bounded as

$$\begin{aligned}
\mathbb{E} \left[ \left\| \widehat{\nabla} \mathcal{L}(\boldsymbol{\theta}; \mathcal{B}) \right\|^4 \right] &\leq \frac{1}{n} \sum_{i \in [n]} \mathbb{E} \left[ |\mathbf{z}_i^T \nabla \mathcal{L}(\boldsymbol{\theta}; \mathcal{B})|^4 \cdot \|\mathbf{z}_i\|^4 \right] \\
&\leq \mathbb{E} \left[ |\mathbf{z}^T \nabla \mathcal{L}(\boldsymbol{\theta}; \mathcal{B})|^8 \right]^{1/2} \mathbb{E} \left[ \|\mathbf{z}\|^8 \right]^{1/2} \\
&\leq \sqrt{105}(d+6)^2 G(\boldsymbol{\theta}_t)^4,
\end{aligned}$$

992 where we have plugged in explicit formulas for moments of Gaussian and  $\chi^2$  random variables.

993 Next, note that on the event  $\neg \mathcal{A}$ , we have

$$2\eta d G(\boldsymbol{\theta}_t) \leq \|\boldsymbol{\theta}_{t+1} - \boldsymbol{\theta}_t\| = \eta \left\| \widehat{\nabla} \mathcal{L}(\boldsymbol{\theta}_t; \mathcal{B}) \right\| \leq \eta \cdot \frac{1}{n} \sum_{i \in [n]} \|\mathbf{z}_i\|^2 G(\boldsymbol{\theta}_t).$$

994 Therefore

$$\Pr[\neg \mathcal{A}] \leq \Pr \left[ \sum_{i \in [n]} \|\mathbf{z}_i\|^2 \geq 2nd \right]$$

995 **Lemma 6** (Standard  $\chi^2$ -tail bound). *Let  $Z$  be a  $\chi^2$  random variable with  $k$  degrees of freedom. Then*

$$\Pr[Z \geq k + u] \leq \exp \left( -\min \left( \frac{u^2}{16k}, \frac{u}{16} \right) \right)$$

996 Since  $\sum_{i \in [n]} \|\mathbf{z}_i\|^2$  is a  $\chi^2$  random variable with  $nd$  degrees of freedom, we thus have that

$$\Pr[\neg \mathcal{A}] \leq \exp \left( -\frac{nd}{16} \right).$$

997 Altogether,

$$\begin{aligned}
\frac{1}{2}\eta^2 \left\langle \mathbb{E} \left[ \widehat{\nabla} \mathcal{L}(\boldsymbol{\theta}; \mathcal{B}) \widehat{\nabla} \mathcal{L}(\boldsymbol{\theta}; \mathcal{B})^T \cdot \mathbf{1}(\neg \mathcal{A}) \right], \ell I - \mathbf{H}(\boldsymbol{\theta}_t) \right\rangle &\leq \eta^2 \ell 105^{1/4} (d+6) G(\boldsymbol{\theta}_t)^2 \exp \left( -\frac{nd}{32} \right) \\
&= \eta^2 \ell G(\boldsymbol{\theta}_t)^2 \exp(-\Omega(nd)).
\end{aligned}$$

998 Finally, plugging in (8), along with the fact that  $\|\mathbf{H}(\boldsymbol{\theta}_t)\|_{op} \leq \ell$  and  $\text{tr}(\mathbf{H}(\boldsymbol{\theta}_t)) \leq \ell r$ ,

$$\begin{aligned} \left\langle \mathbb{E} \left[ \widehat{\nabla} \mathcal{L}(\boldsymbol{\theta}; \mathcal{B}) \widehat{\nabla} \mathcal{L}(\boldsymbol{\theta}; \mathcal{B})^T \right], \mathbf{H}(\boldsymbol{\theta}_t) \right\rangle &= \frac{r+n+1}{n} \cdot \ell \left( \|\nabla \mathcal{L}(\boldsymbol{\theta}_t)\|^2 + \frac{1}{B} \text{tr}(\boldsymbol{\Sigma}(\boldsymbol{\theta}_t)) \right) \\ &= \frac{r+n+1}{n} \cdot \mathbb{E} \left[ \|\nabla \mathcal{L}(\boldsymbol{\theta}_t; \mathcal{B})\|^2 \right] \end{aligned}$$

999 Thus letting  $\gamma = \frac{r+n+1}{n}$  yields

$$\begin{aligned} &\mathbb{E}[\mathcal{L}(\boldsymbol{\theta}_{t+1}) \mid \boldsymbol{\theta}_t] - \mathcal{L}(\boldsymbol{\theta}_t) \\ &\leq -\eta \|\nabla \mathcal{L}(\boldsymbol{\theta}_t)\|^2 + \frac{1}{2} \eta^2 \ell \cdot \gamma \cdot \mathbb{E}[\|\nabla \mathcal{L}(\boldsymbol{\theta}_t; \mathcal{B})\|^2] + \eta^2 \ell G(\boldsymbol{\theta}_t)^2 \exp(-\Omega(nd)), \end{aligned}$$

1000 as desired. □
